# Supplementary material for: Oxygen-implanted MoS2 nanosheets promoting quinoline synthesis from nitroarenes and aliphatic alcohols via an integrated oxidation transfer hydrogenation–cyclization mechanism
Source: Royal Society of Chemistry journal article supplement (doi:10.1039/d1gc04058h), 2022-01-01
Supplement: d1gc04058h1.pdf [file d1gc04058h1.pdf]

## Supporting Information

### **Oxygen-implanted MoS<sub>2</sub> nanosheets promoting quinolines synthesis from nitroarenes and aliphatic alcohols via an integrated oxidation-transfer hydrogenation-cyclization mechanism**

Chaofeng Zhang,<sup>1\*</sup> Zhuyan Gao,<sup>1,2</sup> Puning Ren,<sup>1,2</sup> Jianmin Lu,<sup>1</sup> Zhipeng Huang,<sup>1,2</sup> Kaiyi Su,<sup>1,2</sup> Shichao Zhang,<sup>1</sup> Junju Mu,<sup>1</sup> and Feng Wang<sup>1\*</sup>

<sup>1</sup> State Key Laboratory of Catalysis, Dalian National Laboratory for Clean Energy, Dalian Institute of Chemical Physics, Chinese Academy of Sciences, 457 Zhongshan Road, Dalian 116023, China

<sup>2</sup> University of Chinese Academy of Sciences, Beijing 100049, China

Corresponding Author: zhangcf@dicp.ac.cn;  
wangfeng@dicp.ac.cn

## Table of Contents

|    |                                                                                  |    |
|----|----------------------------------------------------------------------------------|----|
| 1. | NH <sub>3</sub> -TPD characterization of the MoS <sub>2</sub> materials·····     | 3  |
| 2. | The lattice structures of the MoO <sub>2</sub> and MoS <sub>2</sub> ·····        | 4  |
| 3. | The transfer hydrogenation mechanism for nitro reduction·····                    | 5  |
| 4. | The characterizations of other MoS <sub>2</sub> catalysts·····                   | 6  |
| 5  | The recycling use of the O-MoS <sub>2</sub> for 2-methylquinoline synthesis····· | 9  |
| 6  | Controlled experiments·····                                                      | 10 |
| 7  | Characterization of the quinolines·····                                          | 12 |
|    | References·····                                                                  | 28 |

## 1. NH<sub>3</sub>-TPD characterization of the MoS<sub>2</sub> materials

The CUS Mo sites of MoS<sub>2</sub> were probed and quantitatively analyzed by temperature-programmed desorption of ammonia (NH<sub>3</sub>-TPD).<sup>1</sup> Milligrams of MoS<sub>2</sub> sample were loaded into a quartz tubular reactor, which was heated in a vertical electronic furnace. The desorption gas mixture was analyzed by an online mass spectrometer (THERMO<sup>Star</sup> gas analysis system). The sample was initially pretreated at 100 °C under an Ar gas flow (30 mL·min<sup>-1</sup>) for 1 h to remove the adsorbed impurities and then cool down to room temperature. Then the flowing gas was switched to ammonia gas (99.9%) for 30 min at room temperature, and then back to Ar gas. The reactor temperature was increased to 400 °C at a ramp rate of 10 °C·min<sup>-1</sup>. The m/z 17 was recorded for NH<sub>3</sub> and HO\* from H<sub>2</sub>O. The pure NH<sub>3</sub> mass signal was the subtracted value between m/z 17 (NH<sub>3</sub> and HO\*) and the HO\* mass signal based on the reference mass spectrum of H<sub>2</sub>O (m/z 18). The quantification results were calculated by referring to an ammonia standard curve.

**Chart S1.** NH<sub>3</sub>-TPD characterization of the MoS<sub>2</sub> materials

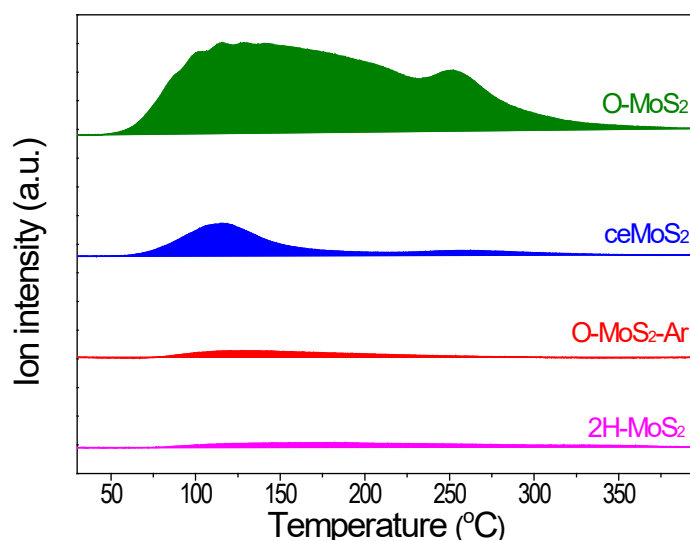

| Sample                 | NH <sub>3</sub><br>( $\mu\text{mol}\cdot\text{g}^{-1}$ ) | R <sub>(CUS Mo)</sub> (%) <sup>[a]</sup> |
|------------------------|----------------------------------------------------------|------------------------------------------|
| 2H-MoS <sub>2</sub>    | 10.7                                                     | 0.17                                     |
| ceMoS <sub>2</sub>     | 34.8                                                     | 0.56                                     |
| O-MoS <sub>2</sub>     | 226.4                                                    | 3.63                                     |
| O-MoS <sub>2</sub> -Ar | 11.2                                                     | 0.18                                     |

[a] The CUS Mo ratio (R<sub>(CUS Mo)</sub>) in MoS<sub>2</sub> catalyst is based on the hypothesis that one CUS Mo site adsorbs one NH<sub>3</sub>, which can be regarded as an indicator to describe the trend of CUS Mo sites in MoS<sub>2</sub> catalysts.

**Note:** The NH<sub>3</sub>-desorbing temperature for the MoS<sub>2</sub> catalysts above were all below 350 °C, which could be classified as weak and medium-strong acid sites for heterogeneous catalysts.

## 2. The lattice structures of the MoO<sub>2</sub> and MoS<sub>2</sub>

As shown in Fig. S1a, the MoO<sub>2</sub> is formed with distorted [MoO<sub>6</sub>] octahedral with 1.97~2.07 Å Mo–O bonds and 78~97 ° O–Mo–O angle, and the Mo···Mo distance ranges from 2.51 to 3.71 Å.<sup>2</sup> Mo in the MoO<sub>2</sub> is six-fold coordinated and the O is three-fold in the bulk and there are two-fold coordinated O species on its surface. In contrast, as shown in Fig. S1b the 2H-MoS<sub>2</sub> is formed with [MoS<sub>3</sub>] triangle vertebral pairs sharing the same Mo vertex with 2.41 Å Mo–S bond, 81.1° S–Mo–S angle, and Mo···Mo distance in the 2H-MoS<sub>2</sub> is 3.15 Å. Besides, the MoS<sub>2</sub> consists of six-fold coordinated Mo species and the three-fold coordinated S species. Therefore, the ligand geometries of O (Mo<sup>(IV)</sup>–O) and S (Mo<sup>(IV)</sup>–S), and the lengths of the Mo–O and Mo–S bonds are remarkably different. The obvious differences between Mo(IV)–O and Mo(IV)–S bonds could cause lattice defects in the oxygen-implanted MoS<sub>2</sub>.

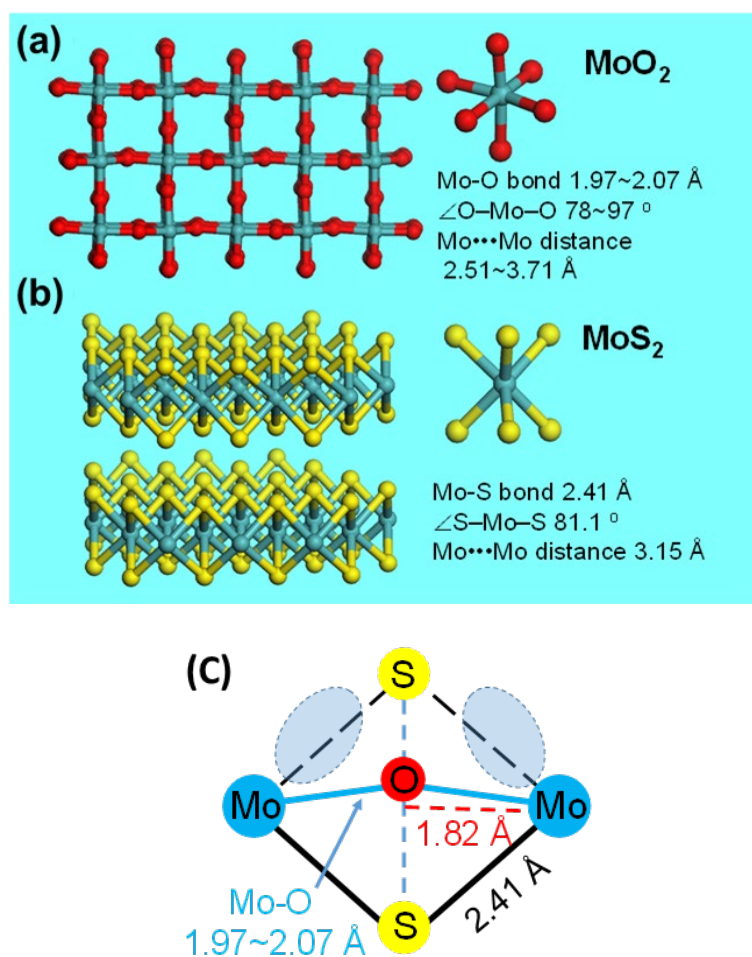

**Fig. S1** The lattice structures of the MoO<sub>2</sub> (a), MoS<sub>2</sub> (b), and their difference(c).

### 3. The transfer hydrogenation mechanism for nitro reduction

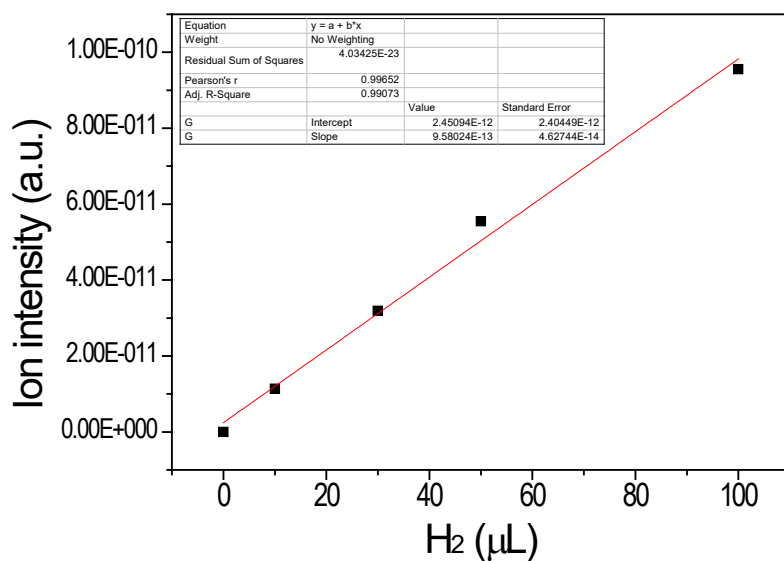

**Fig. S2** The standard working curve of the H<sub>2</sub> with a MS detector.

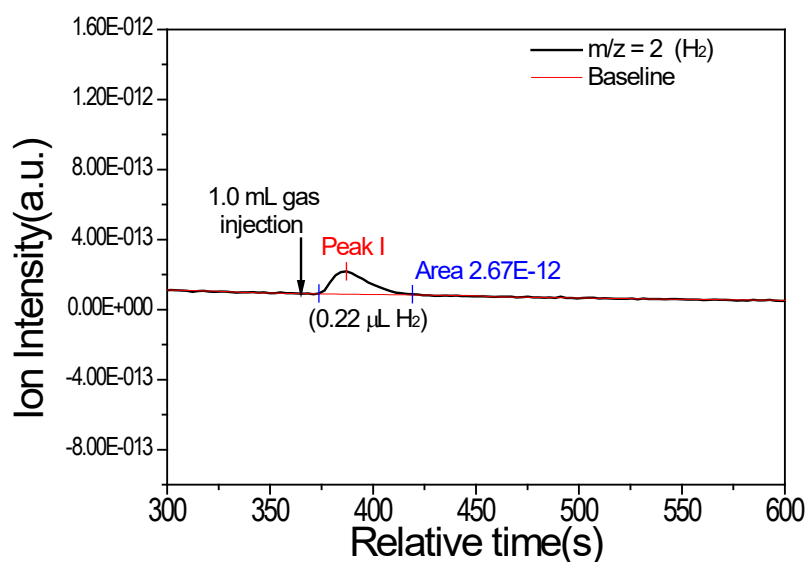

**Fig. S3** The gas analysis of the ethanol decomposition. Reaction condition: ethanol 2.5 mL, O-MoS<sub>2</sub> catalyst 100 mg, reactor volume 15 mL, 1.0 MPa Ar, 180 °C, 4 h.

#### 4. The characterizations of other MoS<sub>2</sub> catalysts

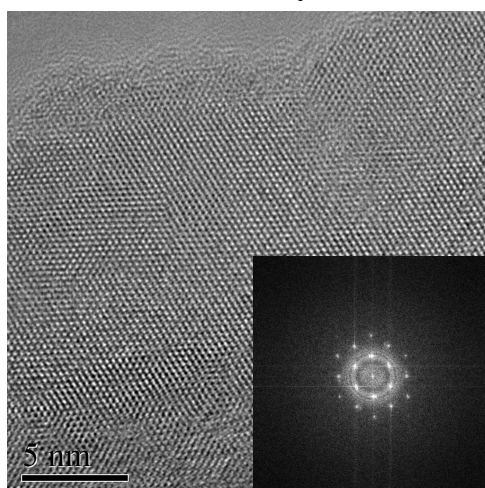

**Fig. S4** The HRTEM image of 2H-MoS<sub>2</sub>.

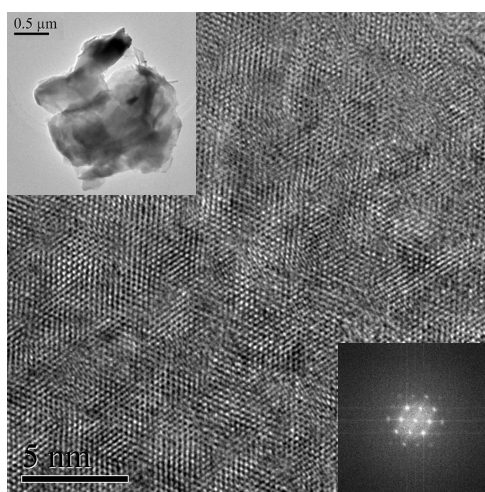

**Fig. S5** The HRTEM image of ceMoS<sub>2</sub>.

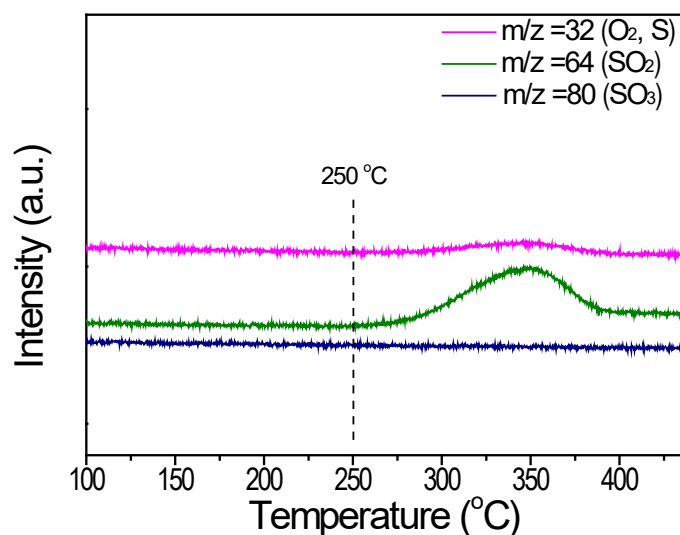

**Fig. S6** The TPD profile of the O-MoS<sub>2</sub> in the Ar flow.

As shown in Fig. 1, thermal treatment of O-MoS<sub>2</sub> in Ar gas at 250 °C for 3 h resulted in the material (O-MoS<sub>2</sub>-Ar) XRD pattern resembled that of commercial 2H-MoS<sub>2</sub> (JCPDS Card No. 37-1492), signifying that the thermal treatment reformed O-MoS<sub>2</sub>. And the TPD-MS results (Fig. S6) showed that there was no lattice oxygen species released from the O-MoS<sub>2</sub> as O<sub>2</sub> or SO<sub>2</sub> below 250 °C in the Ar flow. It could be concluded that the O-MoS<sub>2</sub> and O-MoS<sub>2</sub>-Ar had approximate oxygen contents.

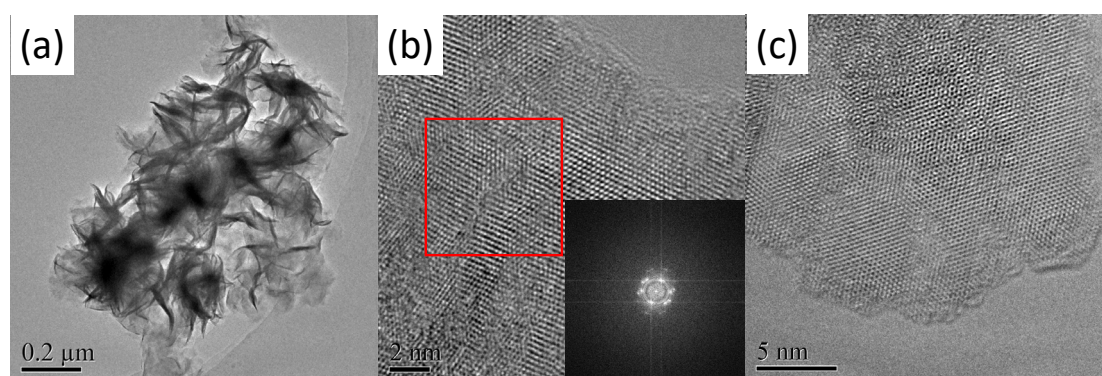

**Fig. S7** The HRTEM images of O-MoS<sub>2</sub>-Ar.

HRTEM characterizations showed the most surface of O-MoS<sub>2</sub>-Ar became ordered without agglomeration (Fig. S7b). As shown in Fig. S7c, there were still some twisted and disordered lattice structures on the O-MoS<sub>2</sub>-Ar surface.

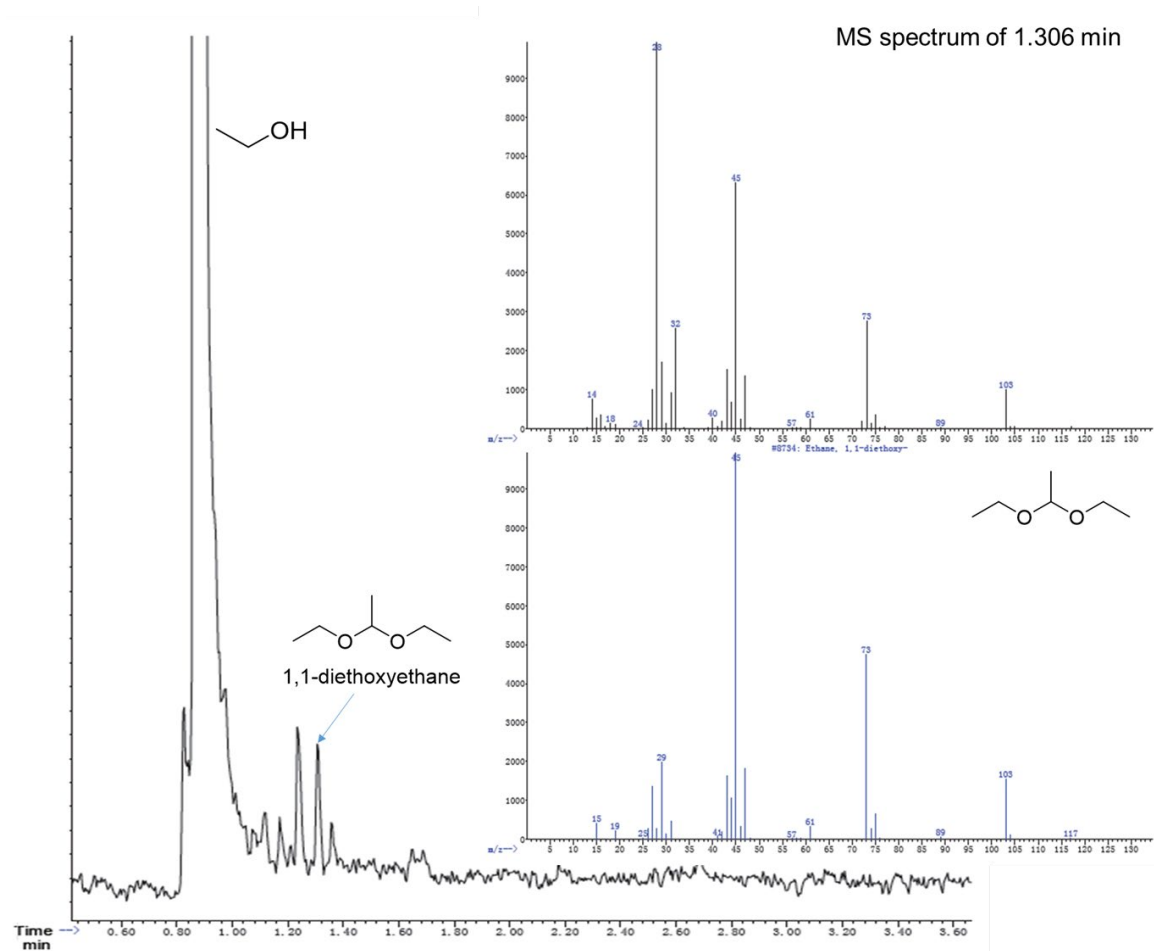

**Fig. S8** The GC-MS spectrum of the liquid phase of reaction between O-MoS<sub>2</sub> and ethanol. Reaction condition: O-MoS<sub>2</sub> 100 mg, ethanol 5.0 mL, 180 °C, Ar 1 atm, 8 h.



## 5. The recycling use of the O-MoS<sub>2</sub> for 2-methylquinoline synthesis

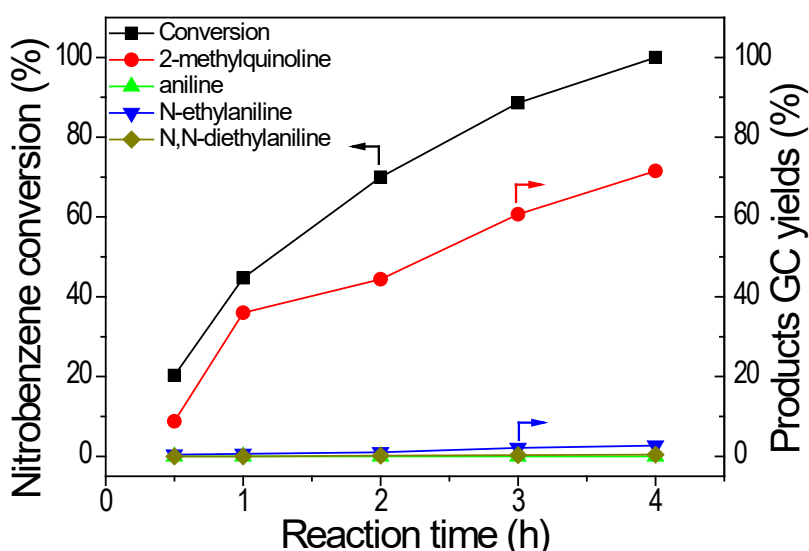

**Fig. S9** The synthesis of 2-methylquinoline from nitrobenzene and ethanol over O-MoS<sub>2</sub> under air atmosphere. Reaction condition: nitrobenzene (0.2 mmol), ethanol (2.5 mL), catalyst 25 mg, air 4 atm, 180 °C.

Recovered the O-MoS<sub>2</sub> catalyst after simple washing and vacuum drying treatment can be directly reused at least nine times for the 2-methylquinoline synthesis from nitrobenzene and ethanol, which showed no obvious decline in catalytic ability (Fig. S9).

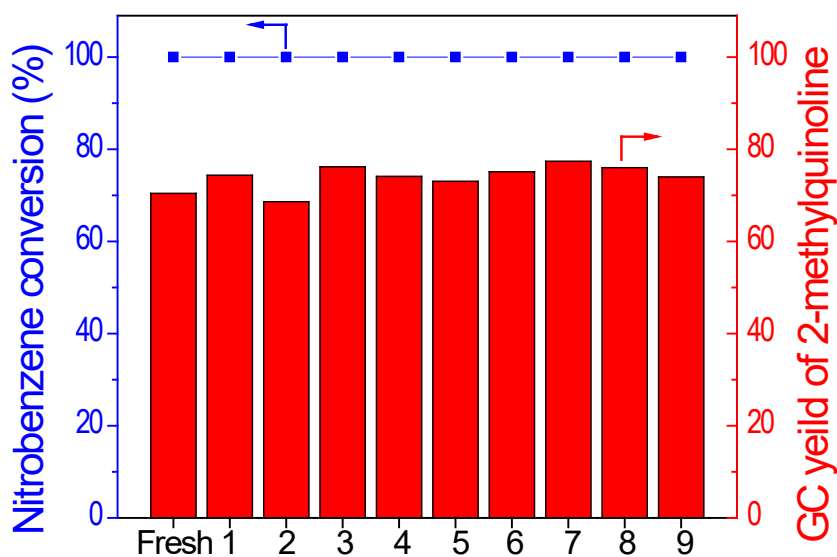

**Fig. S10** The recycling use of the O-MoS<sub>2</sub> for 2-methylquinoline synthesis from nitrobenzene and ethanol. Reaction condition: nitrobenzene (0.2 mmol), ethanol (2.5 mL), catalyst 25 mg, air atmosphere 4 atm, 180 °C, 4 h.

## 6. Controlled experiments

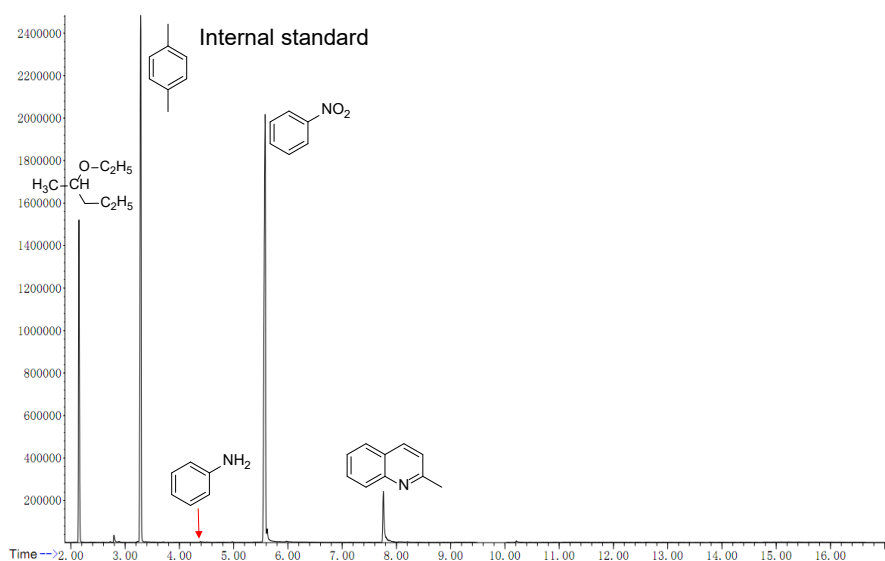

**Fig. S11.** GC-MS pattern of nitrobenzene conversion. Reaction condition: nitrobenzene 0.2 mmol, ethanol 2.5 mL, O-MoS<sub>2</sub> catalyst 25 mg, air 4 atm, 150 °C, 2 h. Note: Para-xylene is used as the internal standard.

After 2 h reaction at 150 °C, 0.014 mmol nitrobenzene was reduced to 2-methylquinoline, and trace aniline was obtained. At the same time, 0.163 mmol aldehyde acetal was generated. Given the fact that the reduction of one nitrobenzene to aniline needs three ethanol molecules, then two generated acetaldehyde or aldehyde acetal react with the aniline to one 2-methylquinoline molecule. Combining with other reaction rate data (Scheme 2 of the manuscript), it can be confirmed that the transfer hydrogenation of nitro groups is the rate-determining step for the substituted quinolines synthesis.

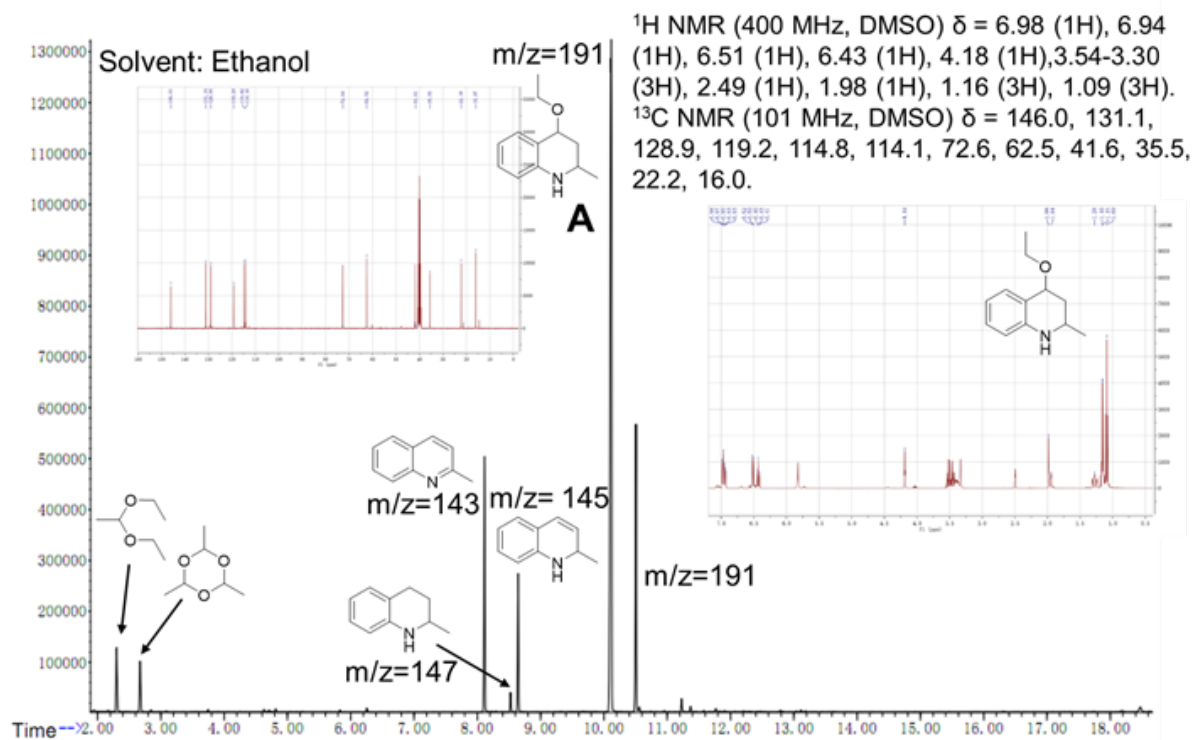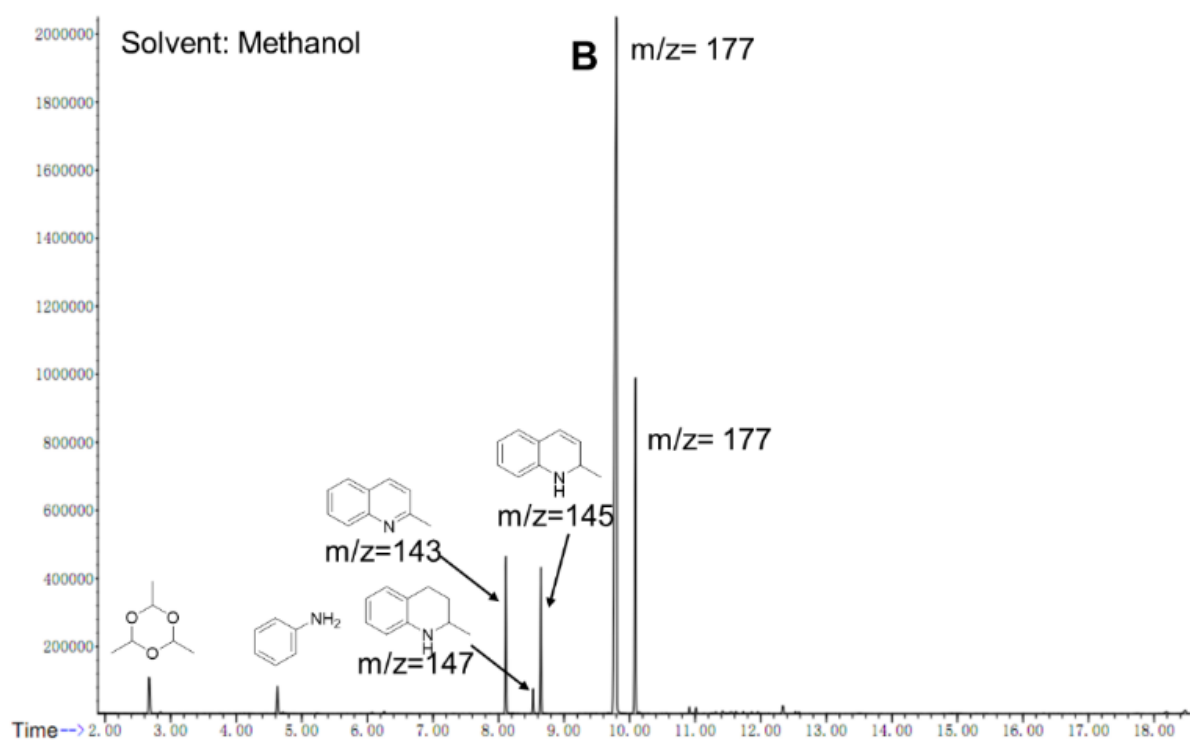

**Fig. S12.** The GC-MS profile of reaction between aniline and aldehyde in ethanol or methanol at 60 °C.

## 7. Characterization of the quinolines

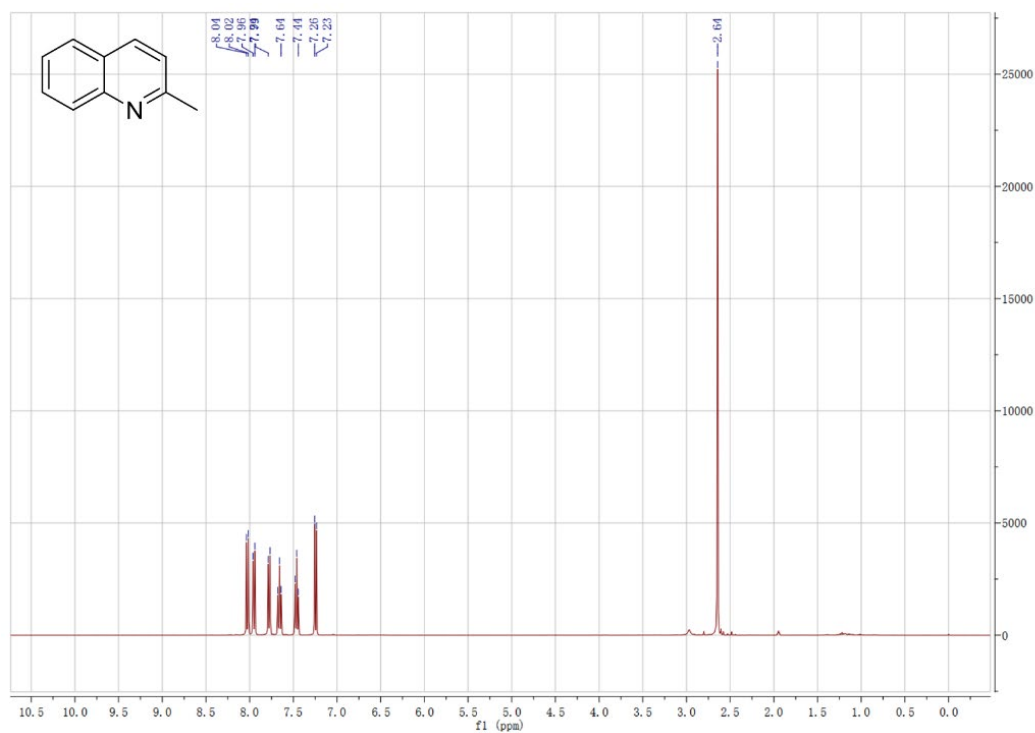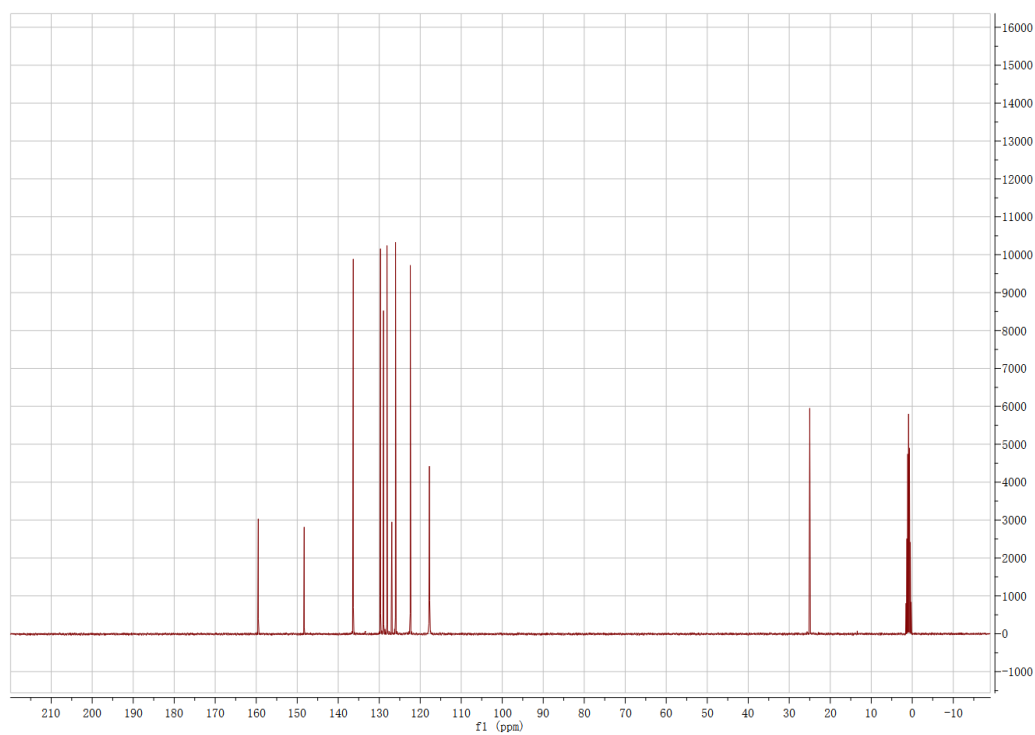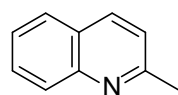

<sup>1</sup>H NMR (400 MHz, CD<sub>3</sub>CN)  $\delta$  8.03 (d, J= 8 Hz, 1 H), 7.95 (d, J= 8 Hz, 1 H), 7.78 (d, J= 8 Hz, 1 H), 7.66 (t, J= 8 Hz, 1 H), 7.46 (t, J= 8 Hz, 1 H), 7.25 (d, J= 12 Hz, 1 H), 2.64 (s, 3 H).  
<sup>13</sup>C NMR (101 MHz, CD<sub>3</sub>CN)  $\delta$  = 159.5, 148.3, 136.3, 129.7, 128.9, 128.1, 126.9, 125.9, 122.4, 24.9.

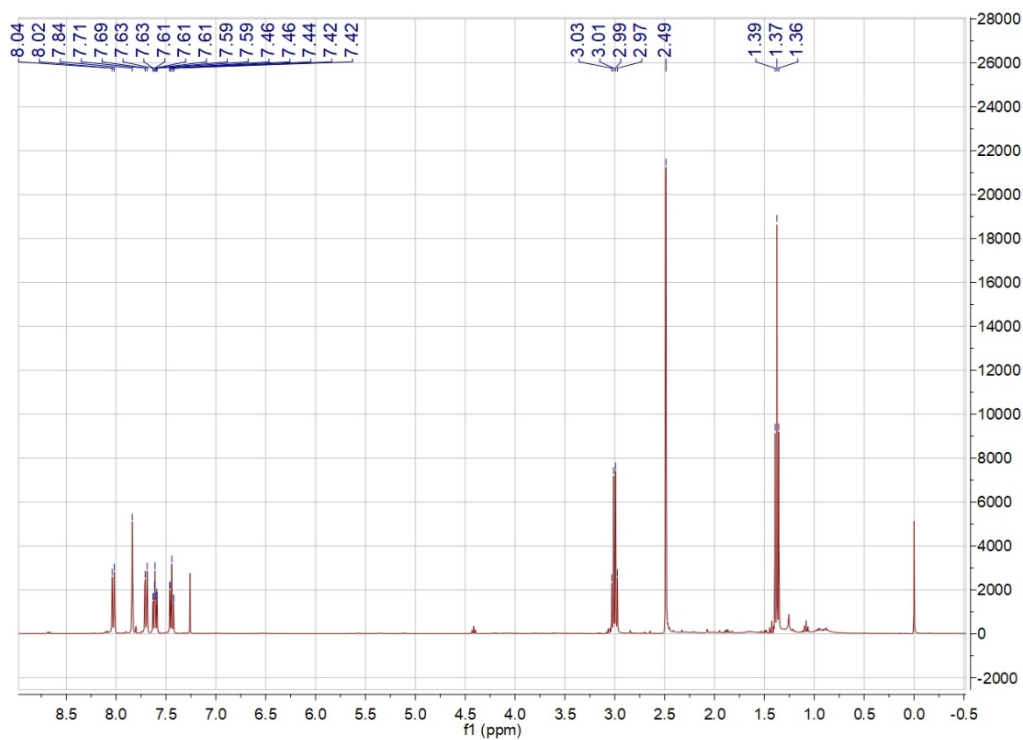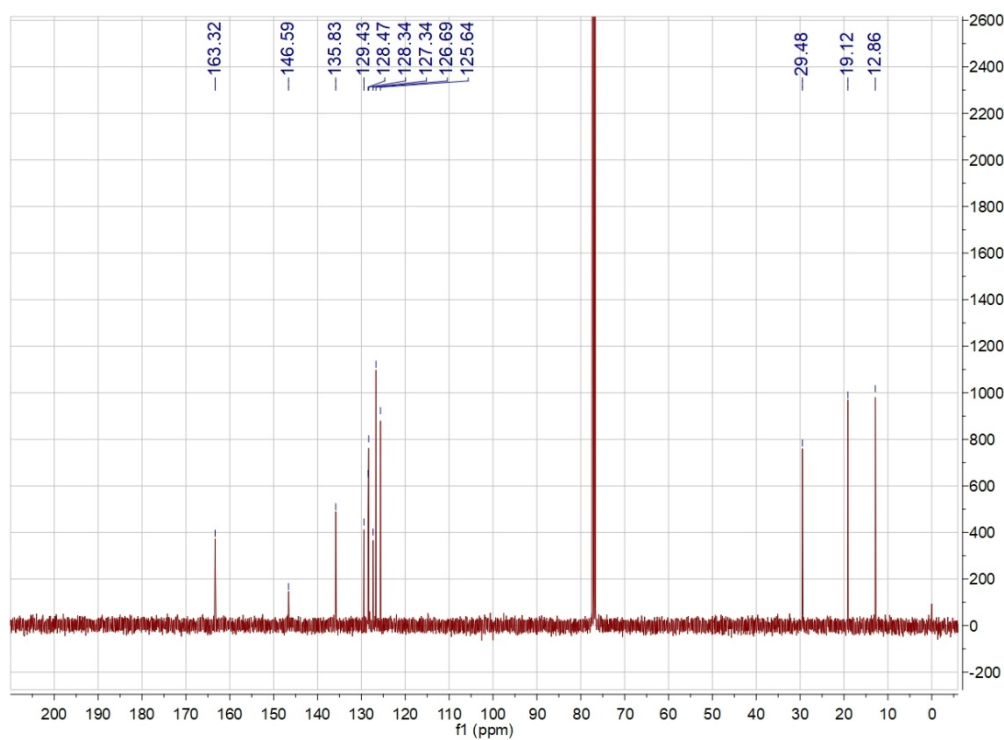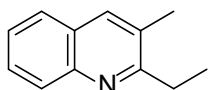

**<sup>1</sup>H NMR (400 MHz, CDCl<sub>3</sub>)** δ=8.03 (d, J= 8.4 Hz, 1H), 7.84 (s, 1H), 7.70 (dd, J<sub>1</sub>=8.0 Hz, J<sub>2</sub>= 0.8 Hz, 1H ), 7.61 (td, J<sub>1</sub>=7.6 Hz, J<sub>2</sub>= 1.2 Hz, 1H), 7.44 (td, J<sub>1</sub>=7.6 Hz, J<sub>2</sub>= 1.2 Hz, 1H), 3.00 (q, J= 7.6 Hz, 2H), 2.49 (s, 3H), 1.37 (t, J= 7.6 Hz, 3H). **<sup>13</sup>C NMR (101 MHz, CDCl<sub>3</sub>)** δ 163.3, 146.6, 135.8, 129.4, 128.5, 128.3, 127.3, 126.7, 125.6, 29.5, 19.1, 12.9.

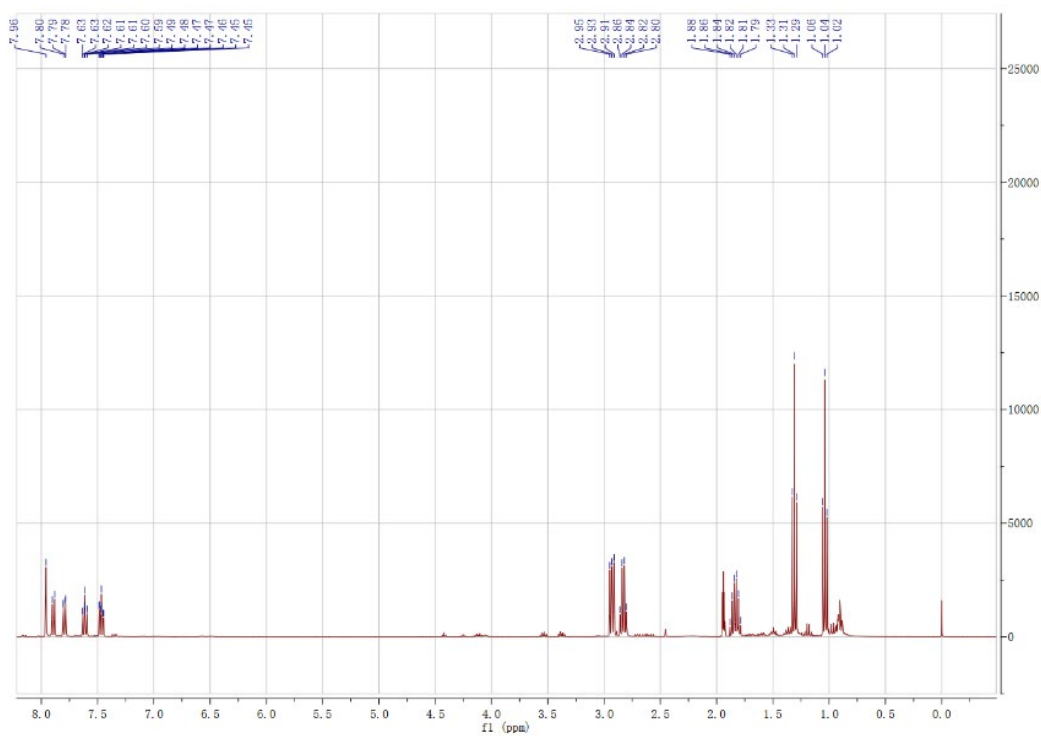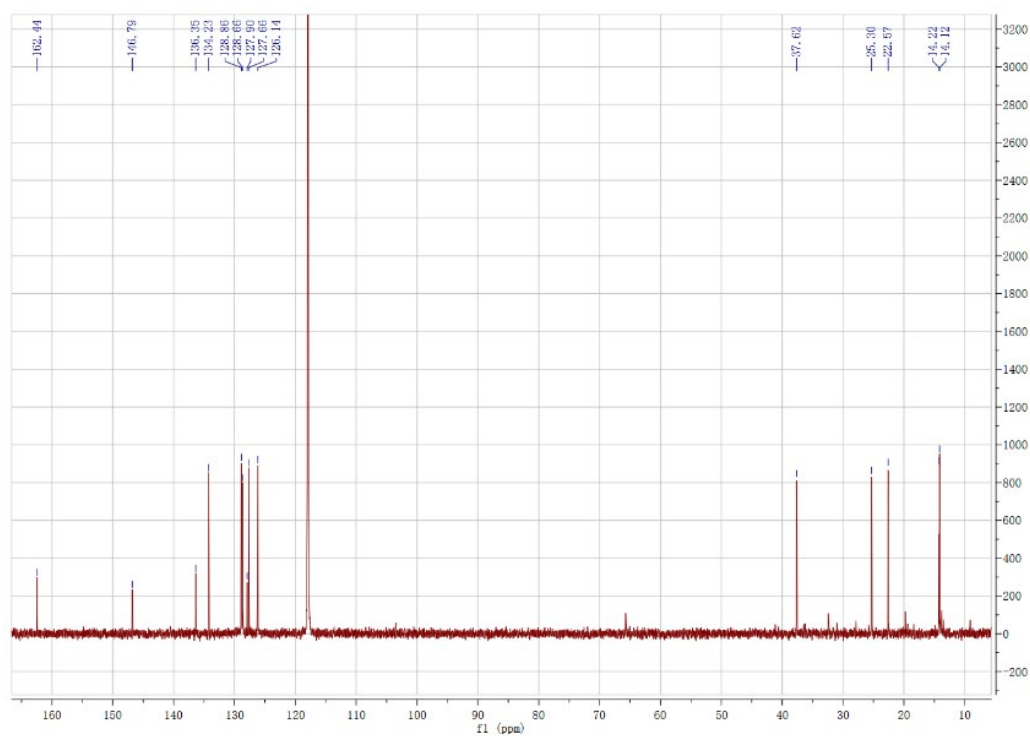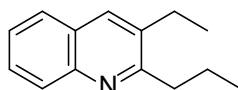

$^1\text{H}$  NMR (400 MHz,  $\text{CD}_3\text{CN}$ )  $\delta$  = 7.96 (s, 1H), 7.89 (d,  $J$  = 8 Hz, 1H), 7.79 (d,  $J$  = 8 Hz, 1H), 7.71 (d,  $J$  = 8 Hz, 1H), 7.46 (t,  $J$  = 8 Hz, 1H), 2.95-2.91 (m, 2H), 2.86-2.80 (2H), 1.88-1.79 (m,  $J$  = Hz, 2H), 1.31 (t,  $J$  = 8 Hz, 3H), 1.04 (t,  $J$  = 8 Hz, 3H).  $^{13}\text{C}$  NMR (101 MHz,  $\text{CD}_3\text{CN}$ )  $\delta$  = 162.4, 146.8, 136.4, 134.2, 128.8, 128.6, 127.9, 127.6, 126.1, 37.6, 25.3, 22.5, 14.2, 14.1.

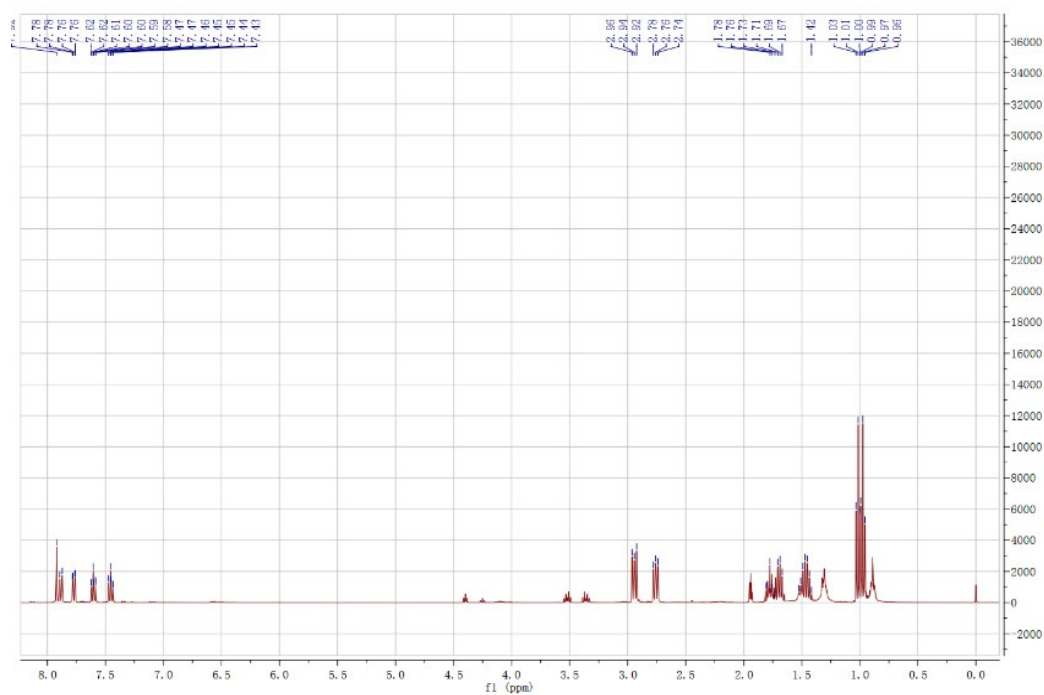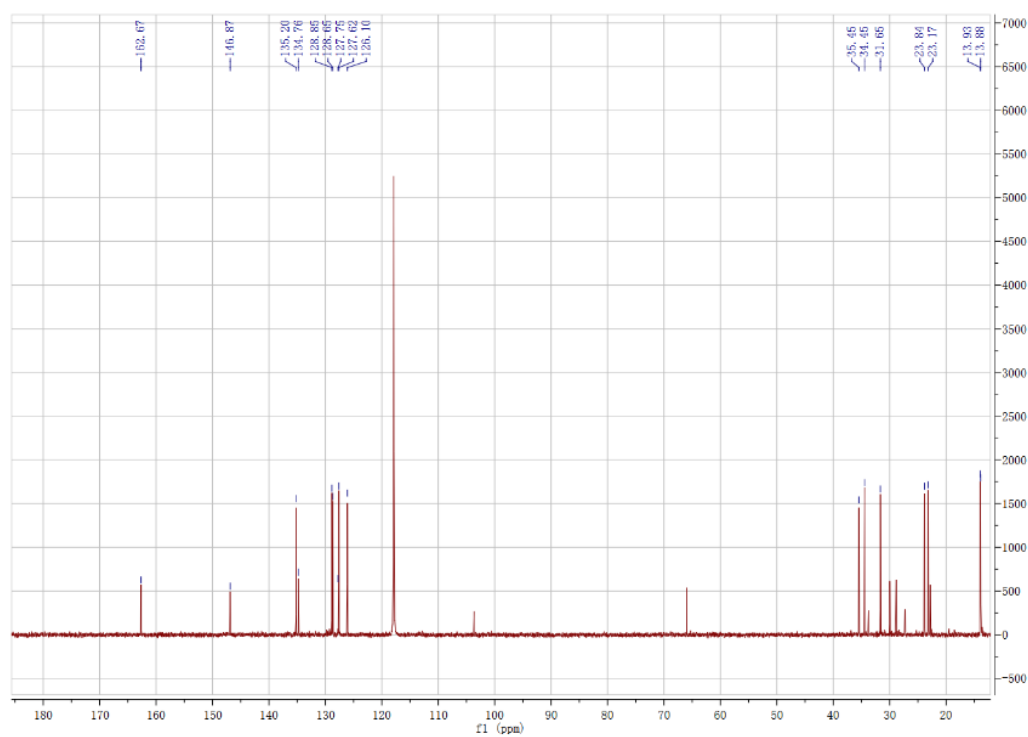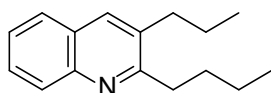

**<sup>1</sup>H NMR (400 MHz, CD<sub>3</sub>CN)** δ = 7.92 (s, 1H), 7.88 (d, J = 8.0 Hz, 1H), 7.77 (dd, J = 8.0, 1.2 Hz, 1H), 7.60 (td, J = 7.5, 1.2 Hz, 1H), 7.45 (td, J = 7.5, 1.2 Hz, 1H), 2.94 (t, J = 8.0 Hz, 2H), 2.76 (t, J = 8.0 Hz, 2H), 1.81-1.67 (m, 4H), 1.50-1.43 (m, 2H), 1.01 (t, J = 8 Hz, 3H), 0.97 (t, J = 8 Hz, 3H). **<sup>13</sup>C NMR (101 MHz, CD<sub>3</sub>CN)** δ = 162.6, 146.9, 135.2, 134.7, 128.8, 128.6, 127.7, 127.6, 126.1, 35.4, 34.4, 31.6, 23.8, 23.2, 13.9, 13.8.

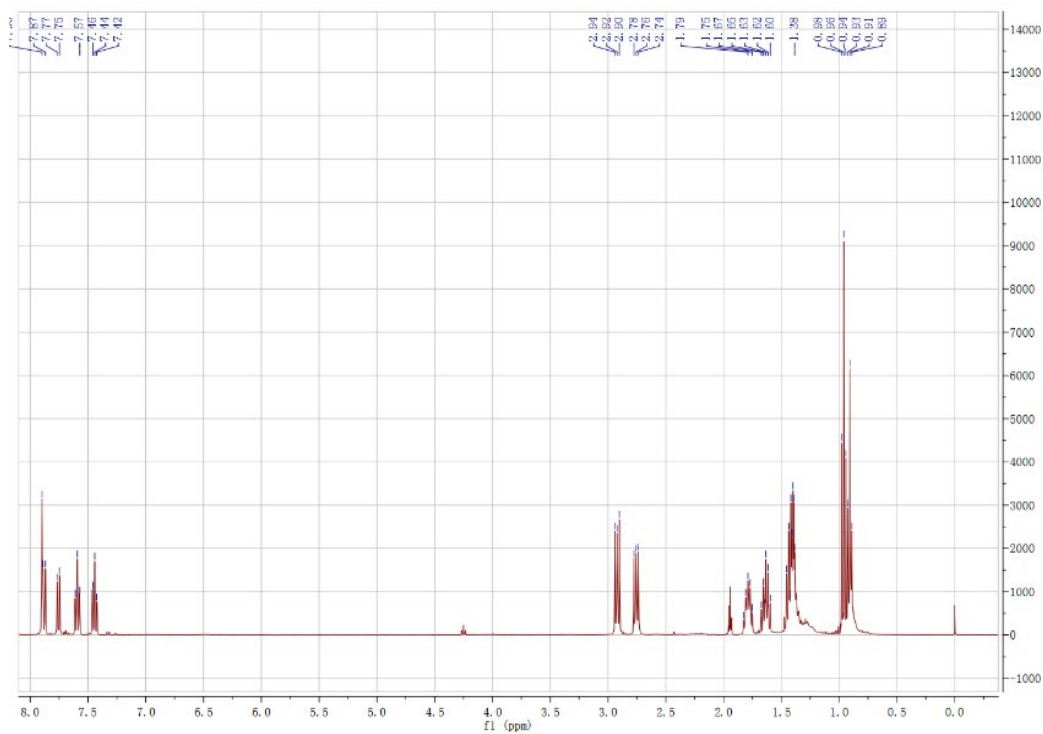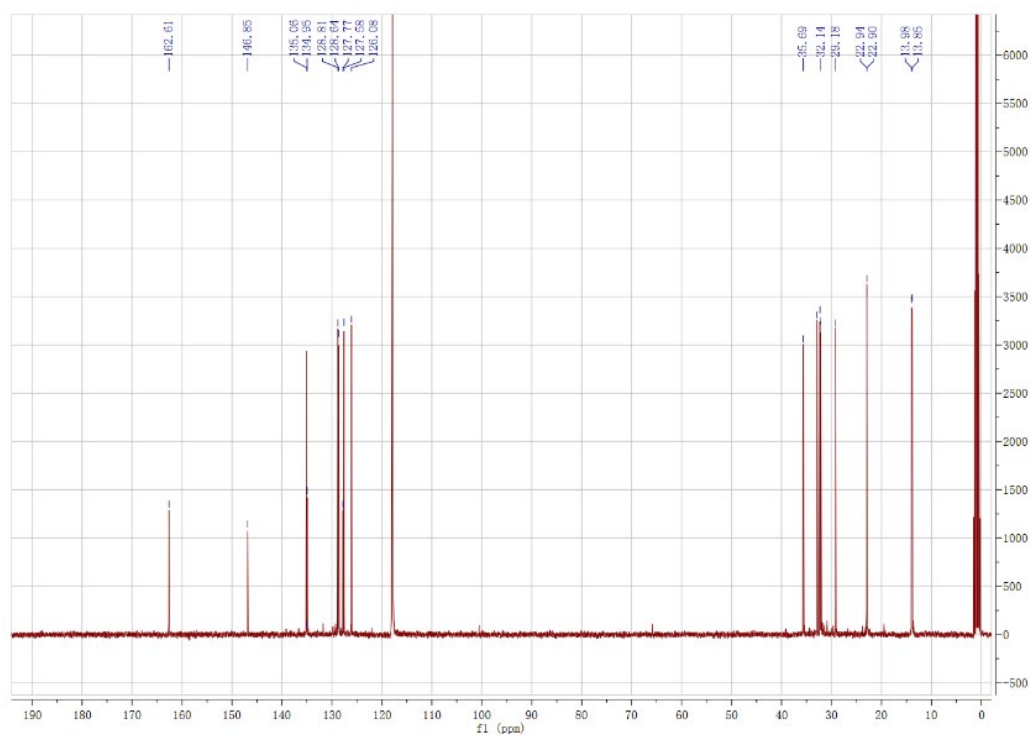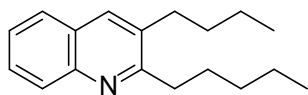

**<sup>1</sup>H NMR (400 MHz, CD<sub>3</sub>CN)**  $\delta$  = 7.90 (s, 1H), 7.88 (d, J = 8 Hz, 1H), 7.76 (d, J = 8 Hz, 1H), 7.59 (t, J = 8 Hz, 1H), 7.44 (t, J = 8 Hz, 1H), 2.92 (t, J = 8 Hz, 2H), 2.76 (t, J = 8 Hz, 2H), 1.83-1.75(m, 2H), 1.67-1.60 (m, 2H), 1.47-1.35 (6H), 0.96 (t, J = 8 Hz, 3H), 0.91 (t, J = 8 Hz, 3H). **<sup>13</sup>C NMR (101 MHz, CD<sub>3</sub>CN)**  $\delta$  = 162.6, 146.8, 135.1, 134.9, 128.8, 128.6, 127.8, 127.6, 126.1, 35.7, 32.9, 32.3, 32.1, 29.2, 22.9, 22.9, 13.9, 13.8.



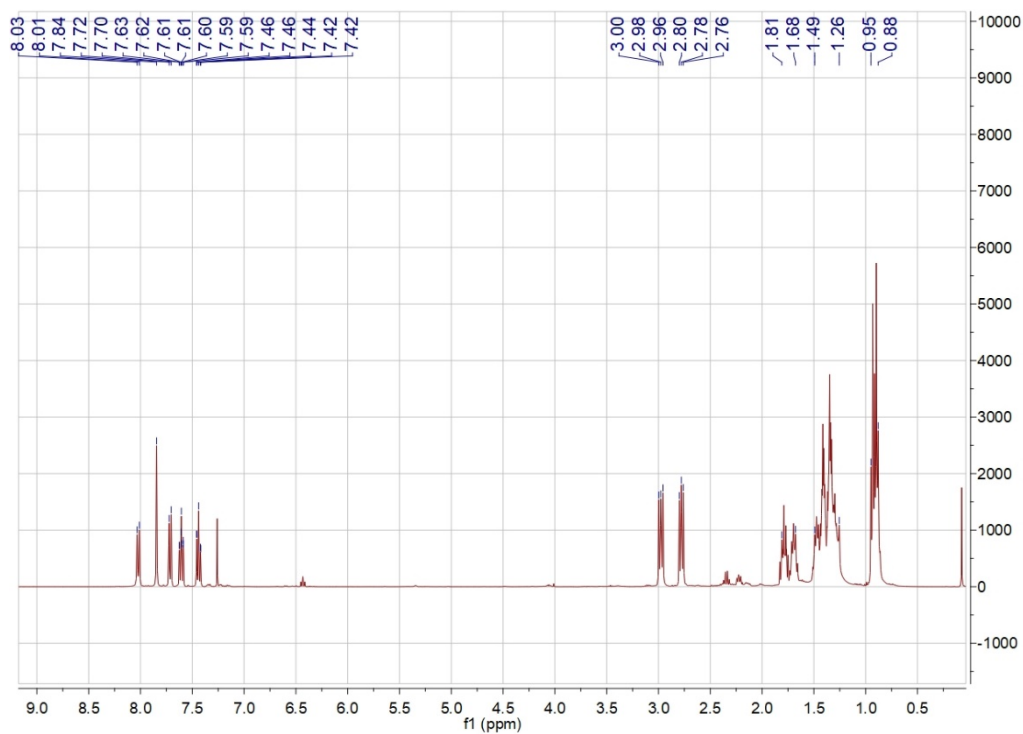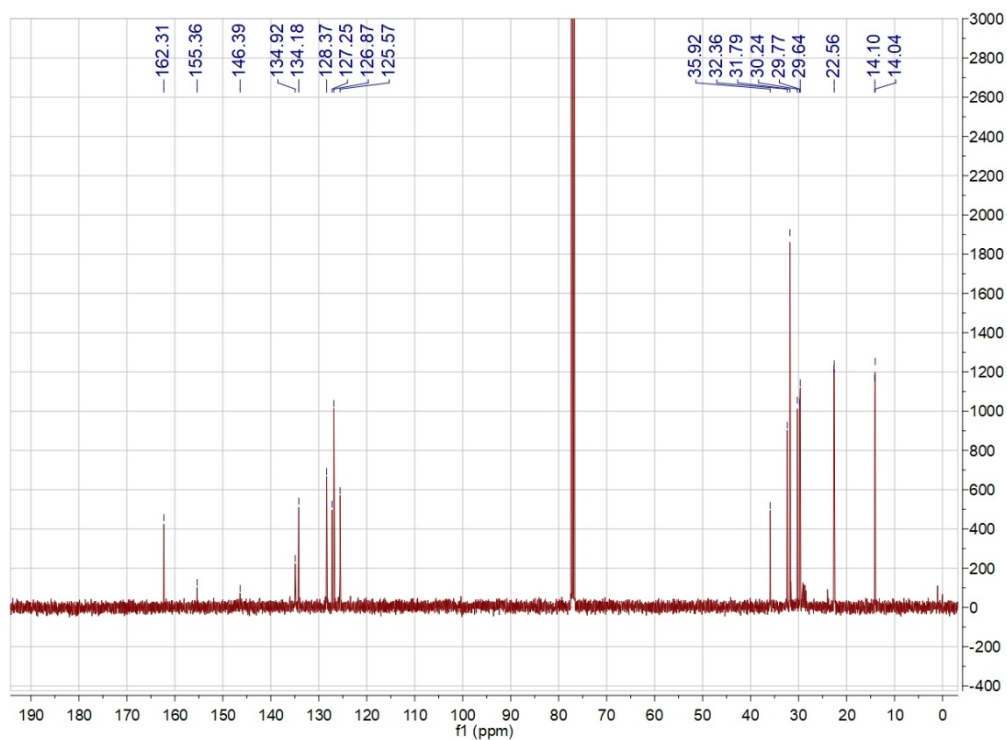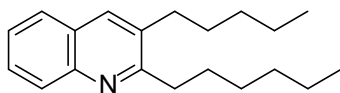

<sup>1</sup>H NMR (400 MHz, CD<sub>3</sub>CN) δ = 8.02 (d, J = 8.4 Hz, 1H), 7.84 (s, 1H), 7.71 (d, J = 8.4 Hz, 1H), 7.61 (td, J<sub>1</sub> = 7.8 Hz, J<sub>2</sub> = 1.2 Hz, 1H), 7.44 (td, J<sub>1</sub> = 7.8 Hz, J<sub>2</sub> = 1.2 Hz, 1H), 2.98 (t, J = 8.0 Hz, 2H), 2.78 (t, J = 8.0 Hz, 2H), 1.81-1.68 (m, 4H), 1.49-1.26 (m, 10H), 0.95-0.88 (m, 6H). <sup>13</sup>C NMR (101 MHz, CD<sub>3</sub>CN) δ = 162.3, 155.4, 146.39, 134.9, 134.2, 128.4, 127.3, 126.9, 125.6, 35.9, 32.4, 31.8, 30.2, 29.8, 29.6, 22.6, 22.5, 14.1, 14.0.

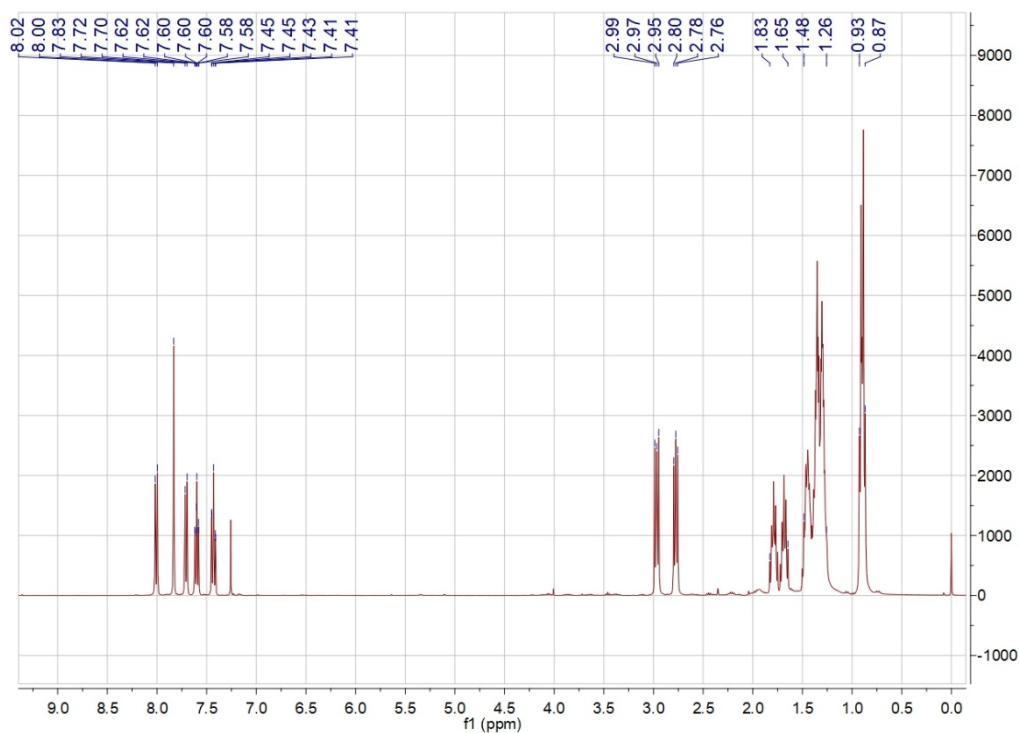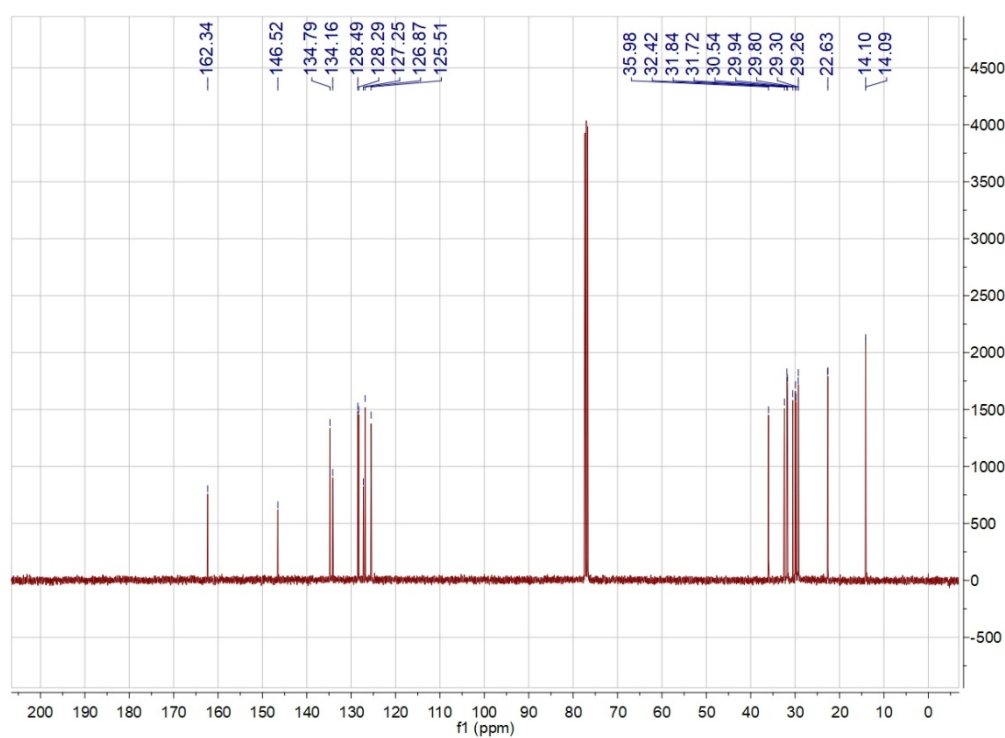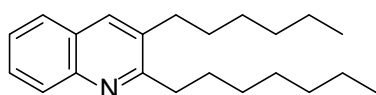

**<sup>1</sup>H NMR (400 MHz, CD<sub>3</sub>CN)** δ = 8.01 (d, J = 8.4 Hz, 1H), 7.83 (s, 1H), 7.71 (d, J = 8.4 Hz, 1H), 7.60 (td, J<sub>1</sub> = 7.8 Hz, J<sub>2</sub> = 1.2 Hz, 1H), 7.43 (td, J<sub>1</sub> = 7.8 Hz, J<sub>2</sub> = 1.2 Hz, 1H), 2.97 (t, J = 8.0 Hz, 2H), 2.78 (t, J = 8.0 Hz, 2H), 1.83-1.65 (m, 4H), 1.48-1.26 (m, 14H), 0.93-0.87 (m, 6H). **<sup>13</sup>C NMR (101 MHz, CD<sub>3</sub>CN)** δ = 162.3, 146.5, 134.8, 134.2, 128.5, 128.3, 127.3, 126.9, 125.5, 36.0, 32.4, 31.8, 31.7, 30.5, 29.9, 29.8, 29.3, 29.3, 22.7, 22.6, 14.10, 14.09.

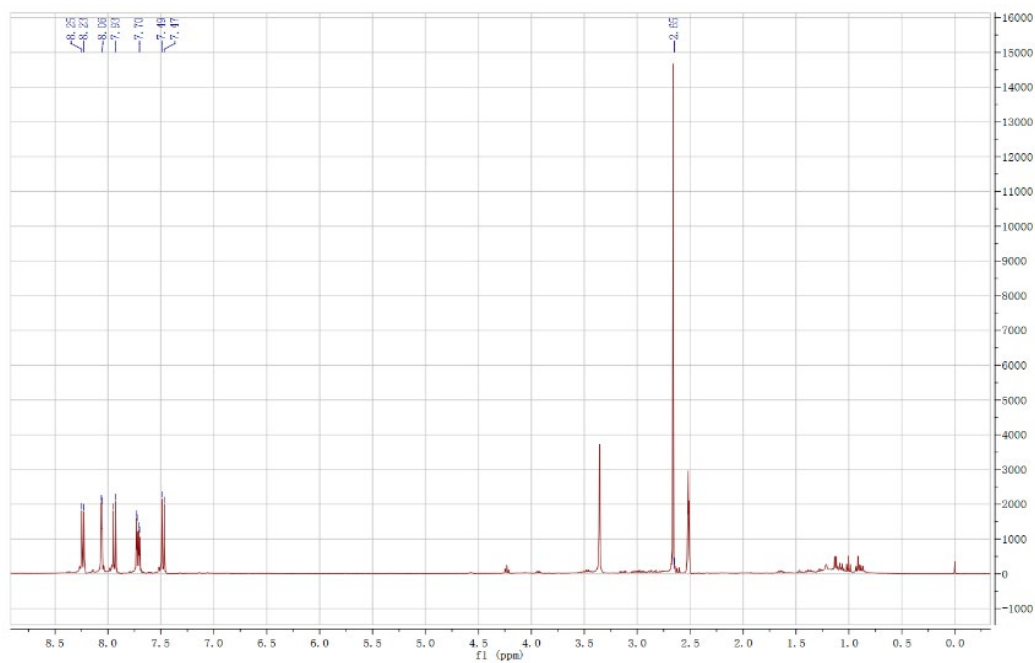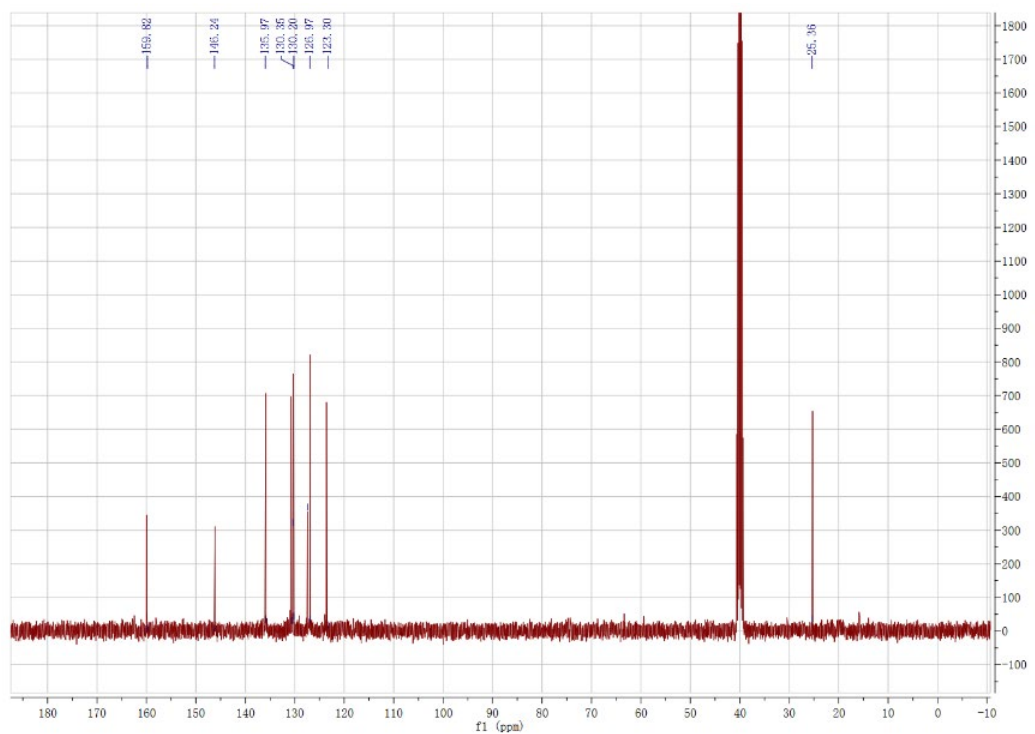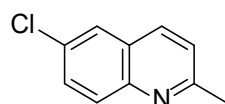

**<sup>1</sup>H NMR (400 MHz, DMSO-d<sub>6</sub>)**  $\delta$  = 8.24 (d, J = 8 Hz, 1H), 8.06 (d, J = 2.4 Hz, 1H), 7.94 (d, J = 8 Hz, 1H), 7.72 (dd, J<sub>1</sub> = 9.2 Hz, J<sub>2</sub> = 2.4 Hz, 1H), 7.47 (d, J = 8 Hz, 1H), 2.66 (s, 3H). **<sup>13</sup>C NMR (101 MHz, DMSO)**  $\delta$  = 159.8, 146.2, 135.9, 130.6, 130.3, 130.2, 127.4, 126.9, 123.3, 25.3.

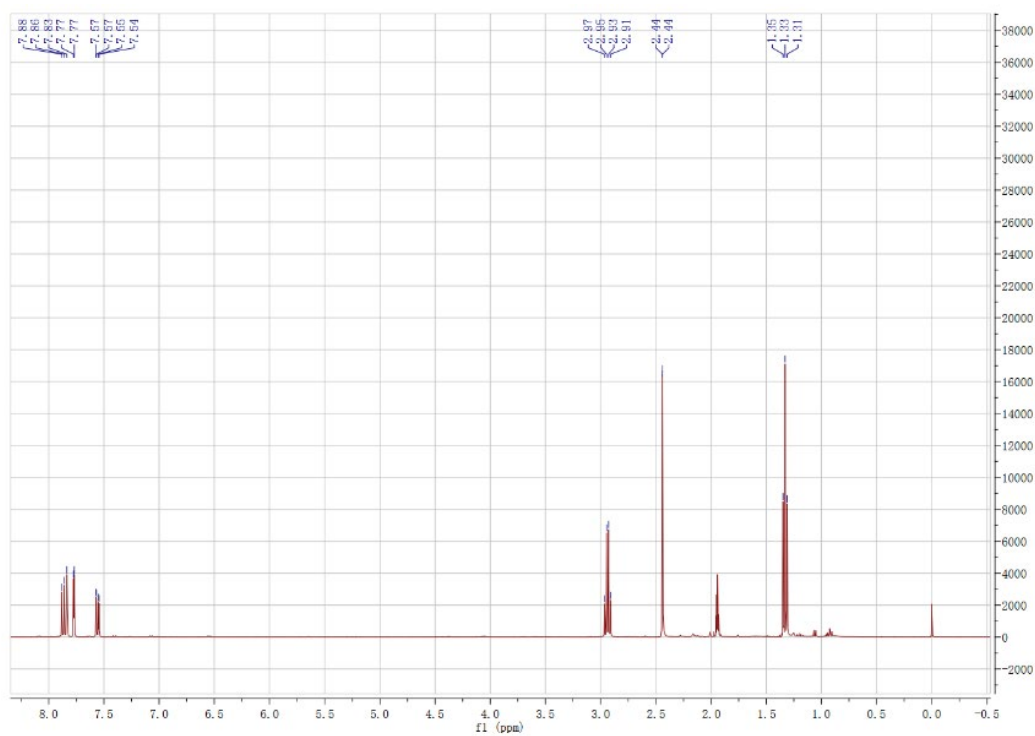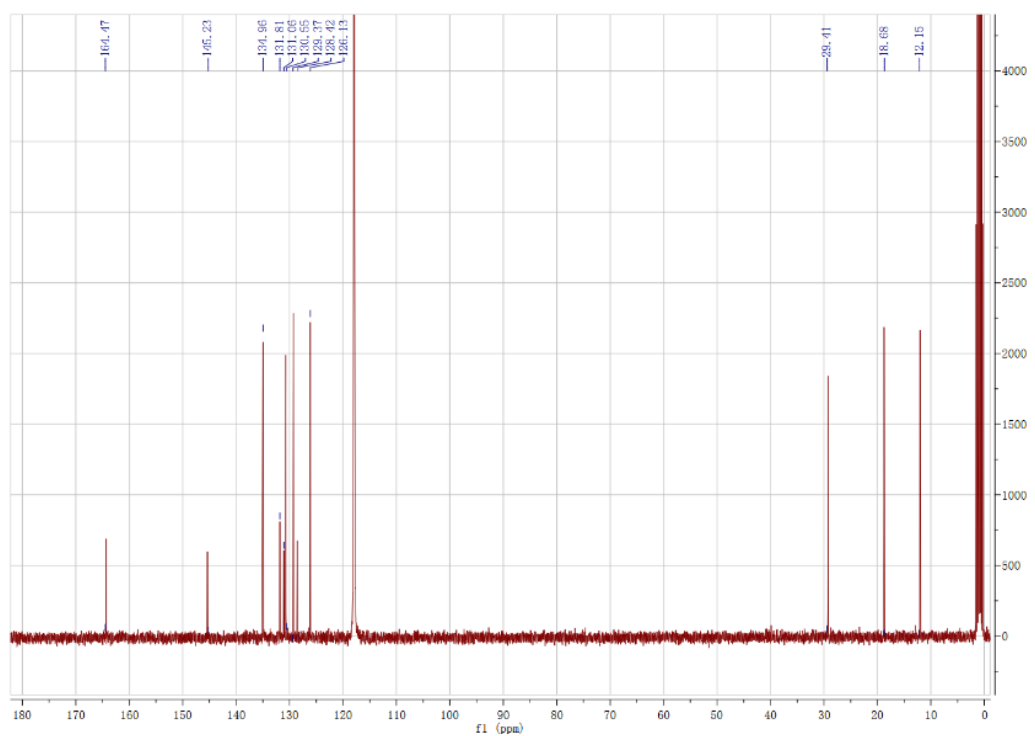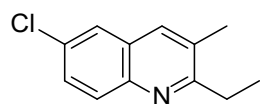

<sup>1</sup>H NMR (400 MHz, CD<sub>3</sub>CN) δ = 7.87 (d, *J* = 8 Hz, 1H), 7.83 (s, 1H), 7.77 (d, *J* = 2.4 Hz, 1H), 7.57, 7.57, 7.55, 7.54 (dd, *J* = 8 Hz, 2.4 Hz, 1H), 2.97-2.91 (q, *J* = 8 Hz, 2H), 2.44 (s, 3H), 1.33 (t, *J* = 8 Hz, 3H). <sup>13</sup>C NMR (101 MHz, CD<sub>3</sub>CN) δ = 164.5, 145.2, 134.9, 131.8, 131.1, 130.5, 129.4, 128.4, 126.1, 29.4, 18.7, 12.2.

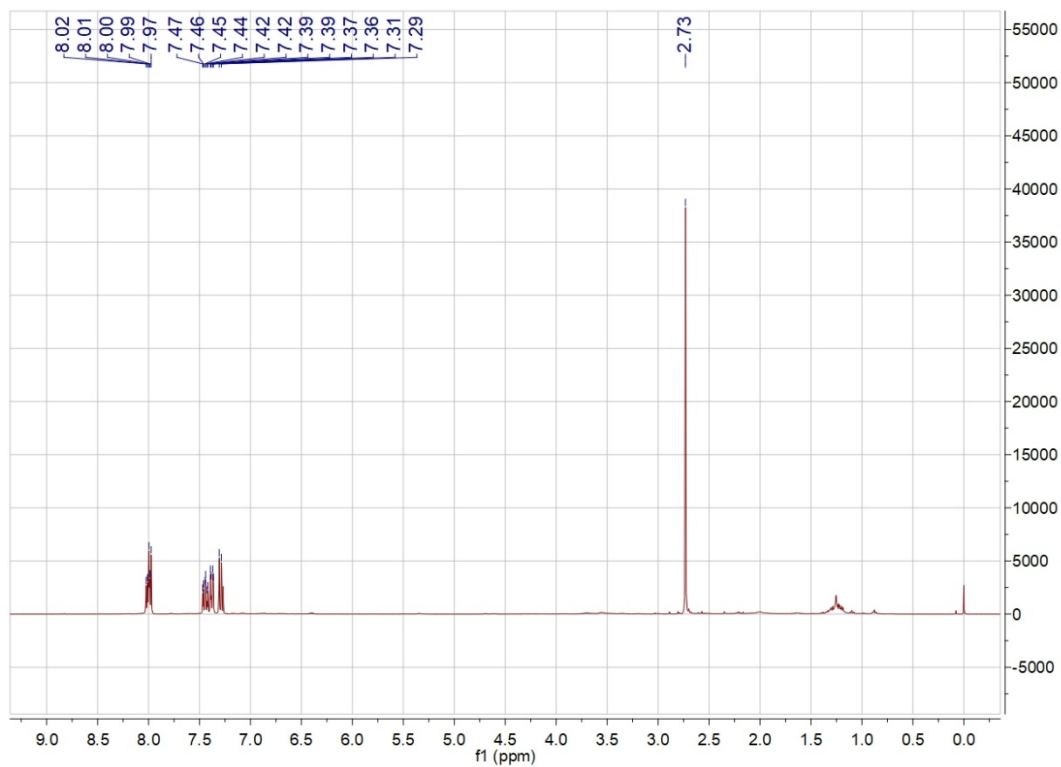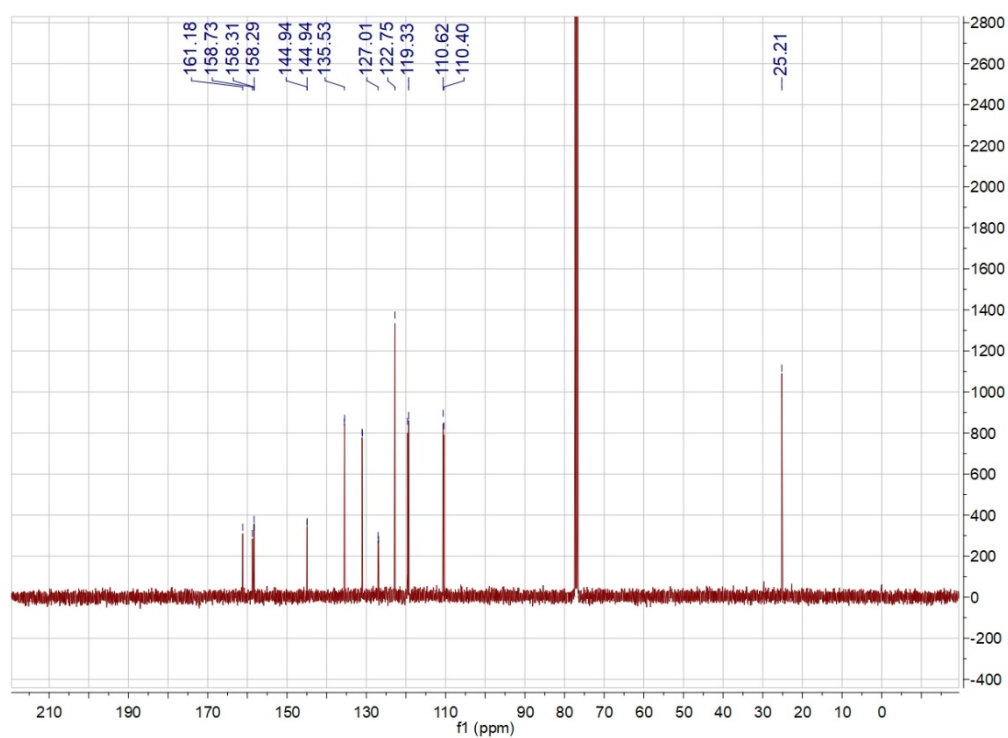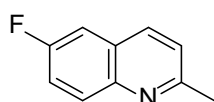

**<sup>1</sup>H NMR (400 MHz, CD<sub>3</sub>Cl)**  $\delta$  = 8.02-7.79 (m, 2H), 7.44 (td,  $J_1$  = 8.8 Hz,  $J_2$  = 2.8 Hz, 1H), 7.38 (dd,  $J_1$  = 8.8 Hz,  $J_2$  = 2.8 Hz, 1H), 7.30 (d,  $J$  = 8.4 Hz, 1H), 2.73 (s, 1H). **<sup>13</sup>C NMR (101 MHz, CDCl<sub>3</sub>)**  $\delta$  161.2, 158.7, 158.3 (d,  $J$  = 2.7 Hz), 144.9 (d,  $J$  = 0.6 Hz), 135.5 (d,  $J$  = 5.3 Hz), 131.0 (d,  $J$  = 9.1 Hz), 127.0 (d,  $J$  = 9.9 Hz), 122.8, 119.4 (d,  $J$  = 25.6 Hz), 110.5 (d,  $J$  = 21.6 Hz), 25.2.

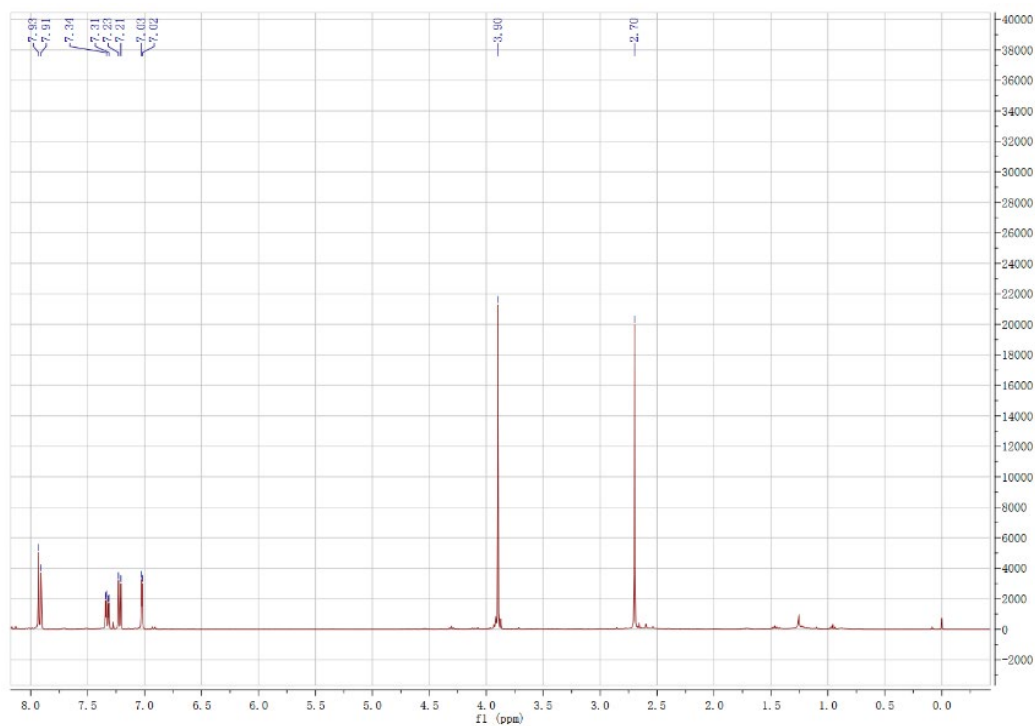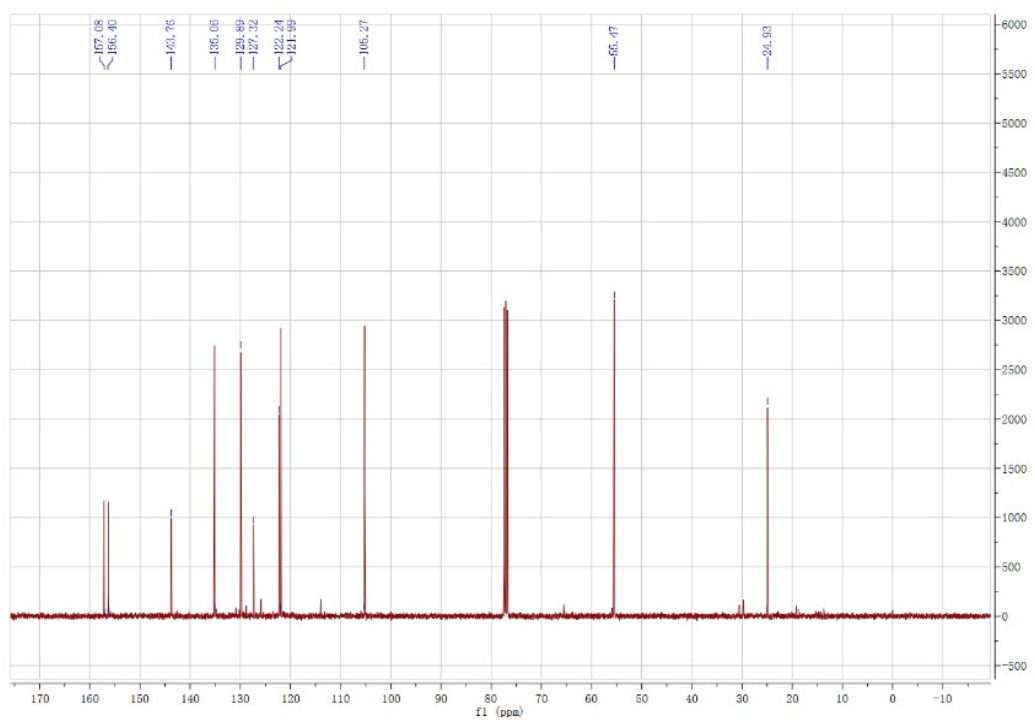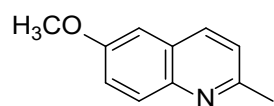

**<sup>1</sup>H NMR (400 MHz, CDCl<sub>3</sub>)**  $\delta$  = 7.93 (s, 1H), 7.91 (s, 1H), 7.33 (dd,  $J_1$  = 4.2 Hz,  $J_2$  = 2.8 Hz, 1H), 7.22 (d,  $J$  = 8.4 Hz, 1H), 7.03 (d,  $J$  = 2.8 Hz, 1H), 3.90 (s, 3H), 2.70 (s, 3H).  
**<sup>13</sup>C NMR (101 MHz, CDCl<sub>3</sub>)**  $\delta$  = 157.1, 156.4, 143.7, 135.1, 129.9, 127.3, 122.2, 122.0, 105.3, 55.5, 24.9.

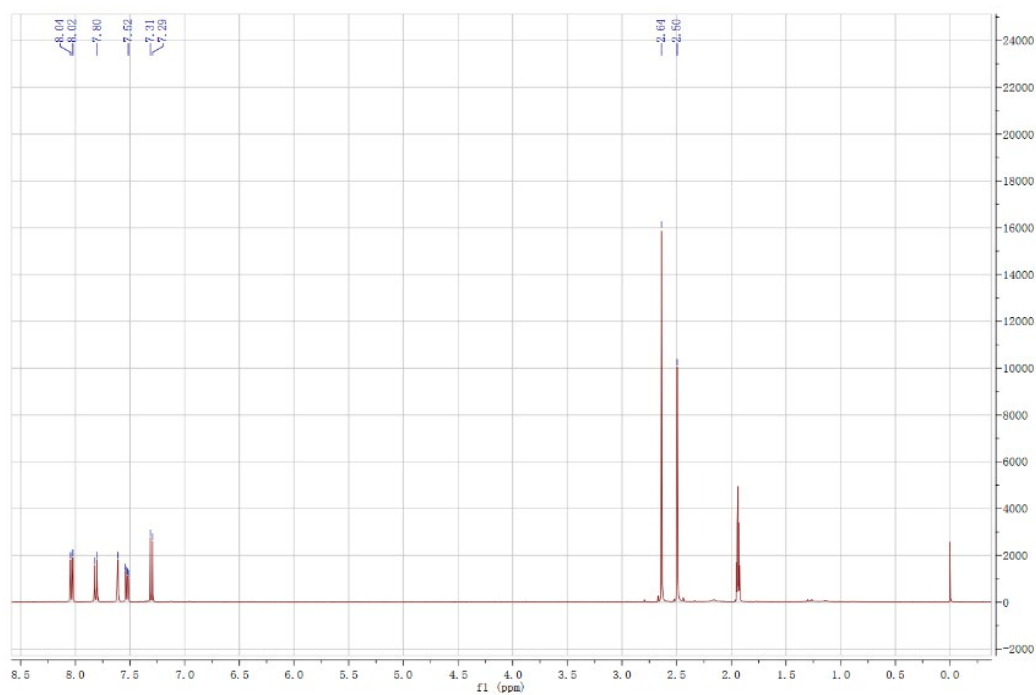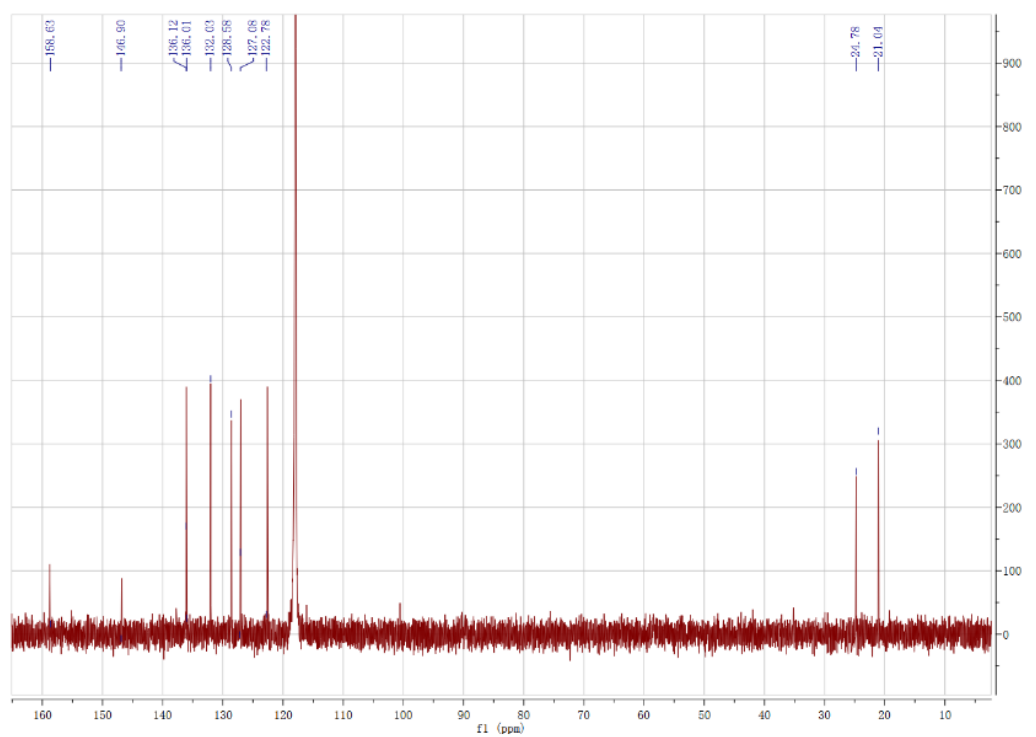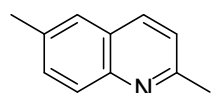

**<sup>1</sup>H NMR (400 MHz, CD<sub>3</sub>CN)**  $\delta$  = 8.03 (d,  $J$  = 8 Hz, 1H), 7.81 (d,  $J$  = 8 Hz, 1H), 7.61 (s, 1H), 7.53 (d,  $J$  = 8 Hz, 1H), 7.30 (d,  $J$  = 8 Hz, 1H), 2.64 (s, 3H), 2.50 (s, 3H). **<sup>13</sup>C NMR (101 MHz, CD<sub>3</sub>CN)**  $\delta$  = 158.6, 146.9, 136.1, 136.0, 132.0, 128.6, 127.2, 127.1, 122.8, 24.8, 21.0.

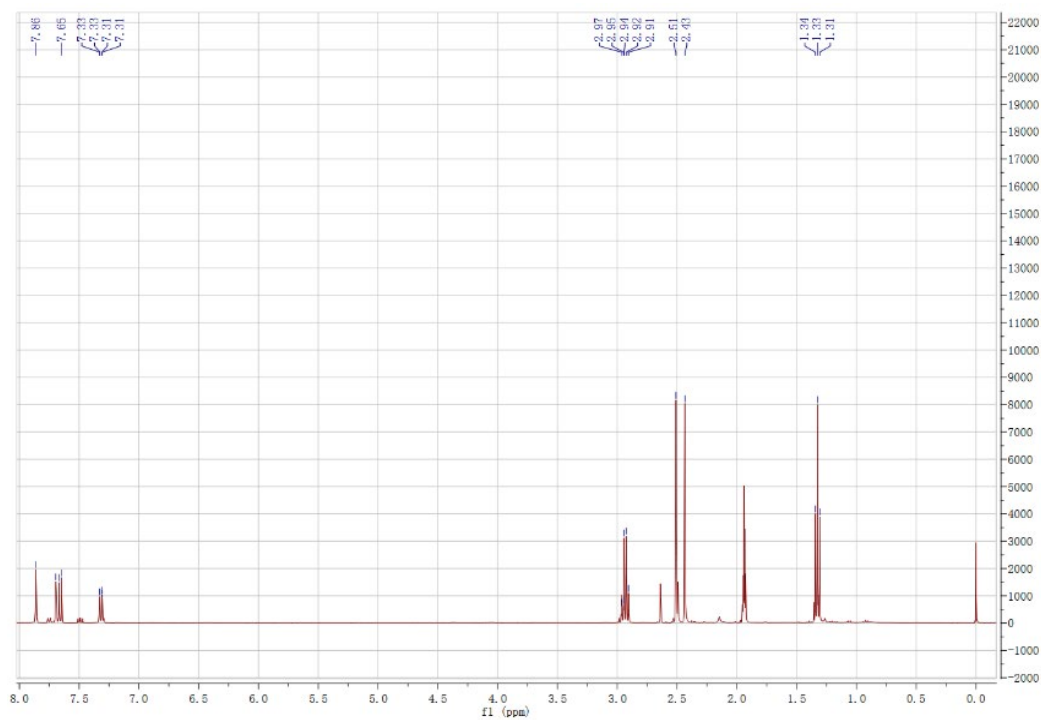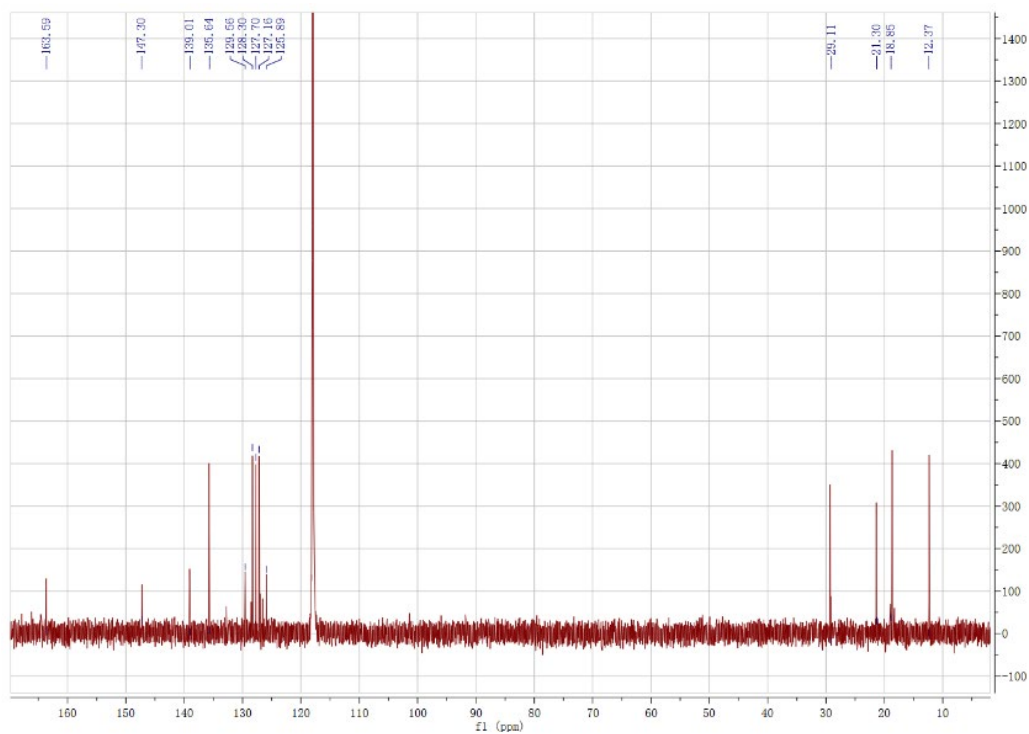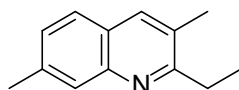

**<sup>1</sup>H NMR (400 MHz, CD<sub>3</sub>CN)**  $\delta$  = 7.86 (s, 1H), 7.70 (s, 1H), 7.65 (d, J= 8 Hz, 1 H), 7.32 (dd, J<sub>1</sub>= 8 Hz, J<sub>2</sub>= 1.6 Hz, 1H), 2.93 (q, J= 7.6 Hz, 2 H), 2.51 (s, 3H), 2.43(s, 3H), 1.33 (t, J= 7.6 Hz, 3H). **<sup>13</sup>C NMR (101 MHz, CD<sub>3</sub>CN)**  $\delta$  = 163.6, 147.3, 139.0, 135.6, 129.6, 128.3, 127.7, 127.1, 125.9, 29.1, 21.3, 18.8, 12.4



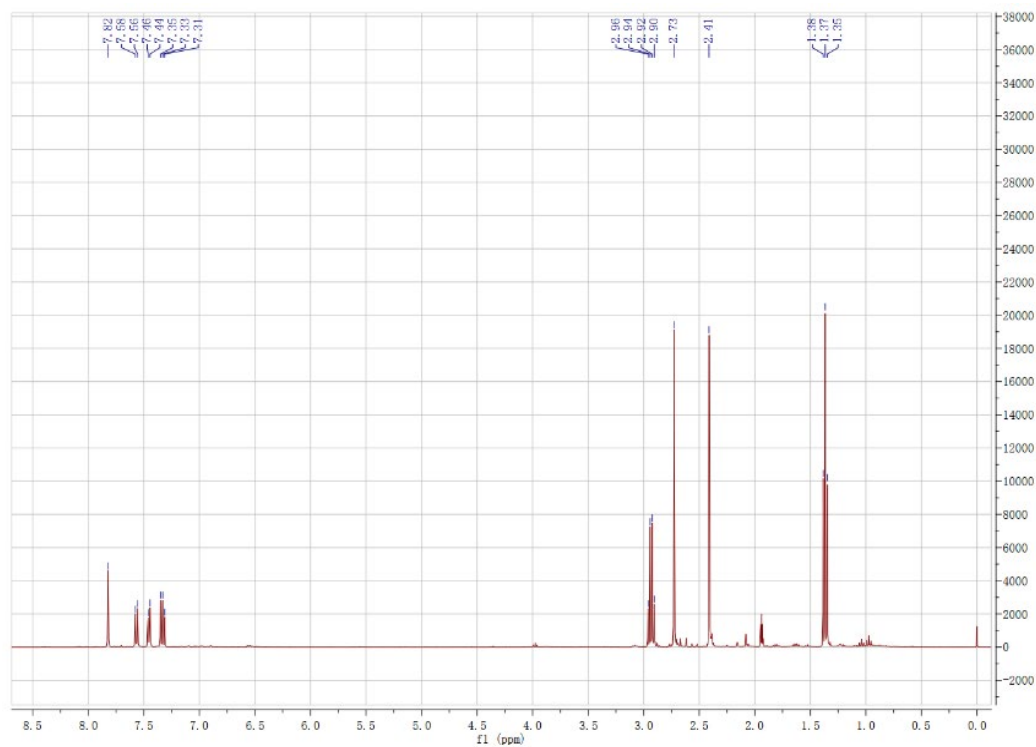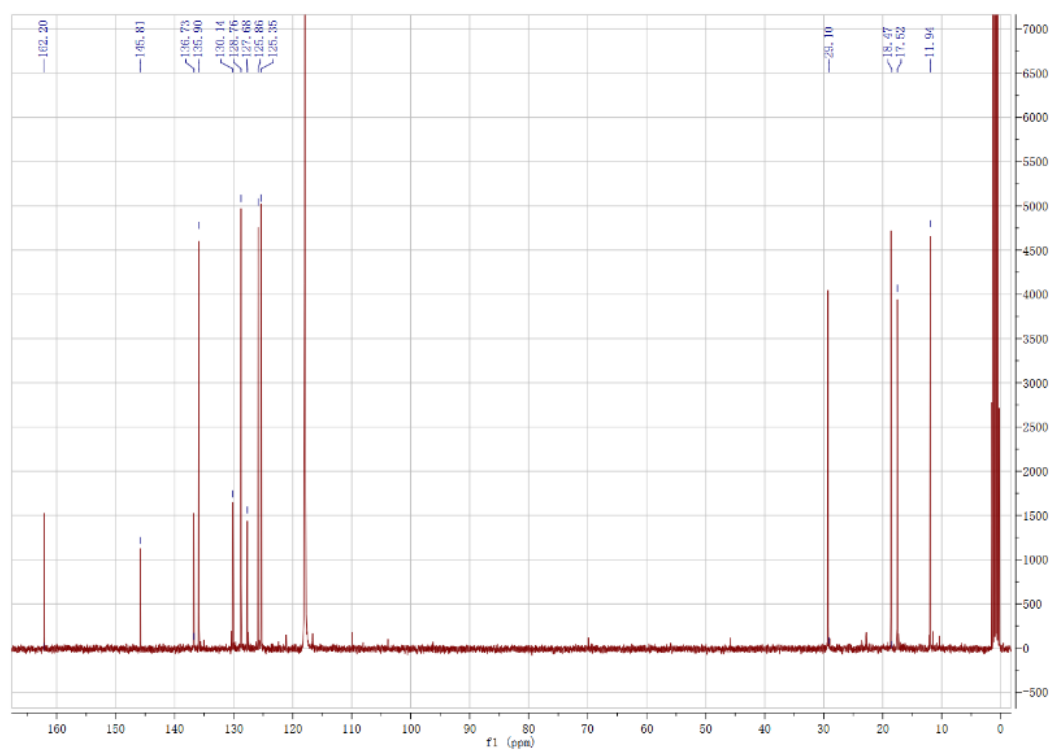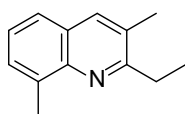

**<sup>1</sup>H NMR (400 MHz, CD<sub>3</sub>CN)**  $\delta$  = 7.82 (s, 1H), 7.57 (d,  $J$  = 8 Hz, 1H), 7.45 (d,  $J$  = 6.8 Hz, 1H), 7.33 (t,  $J$  = 8 Hz, 1H), 2.92 (q,  $J$  = 7.5 Hz, 2H), 2.73 (s, 3H), 2.41 (s, 3H), 1.37 (t,  $J$  = 7.5 Hz, 3H). **<sup>13</sup>C NMR (101 MHz, CD<sub>3</sub>CN)**  $\delta$  = 162.2, 145.8, 136.7, 135.9, 130.1, 128.7, 127.7, 125.8, 125.3, 29.1, 18.45, 17.5, 11.9.

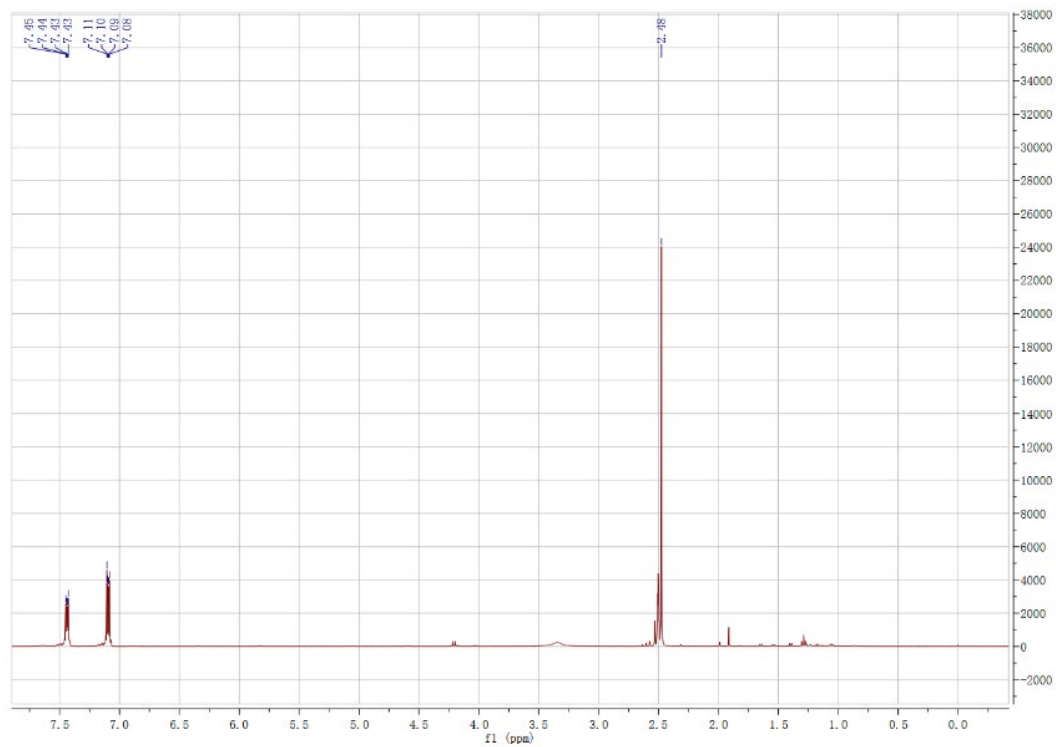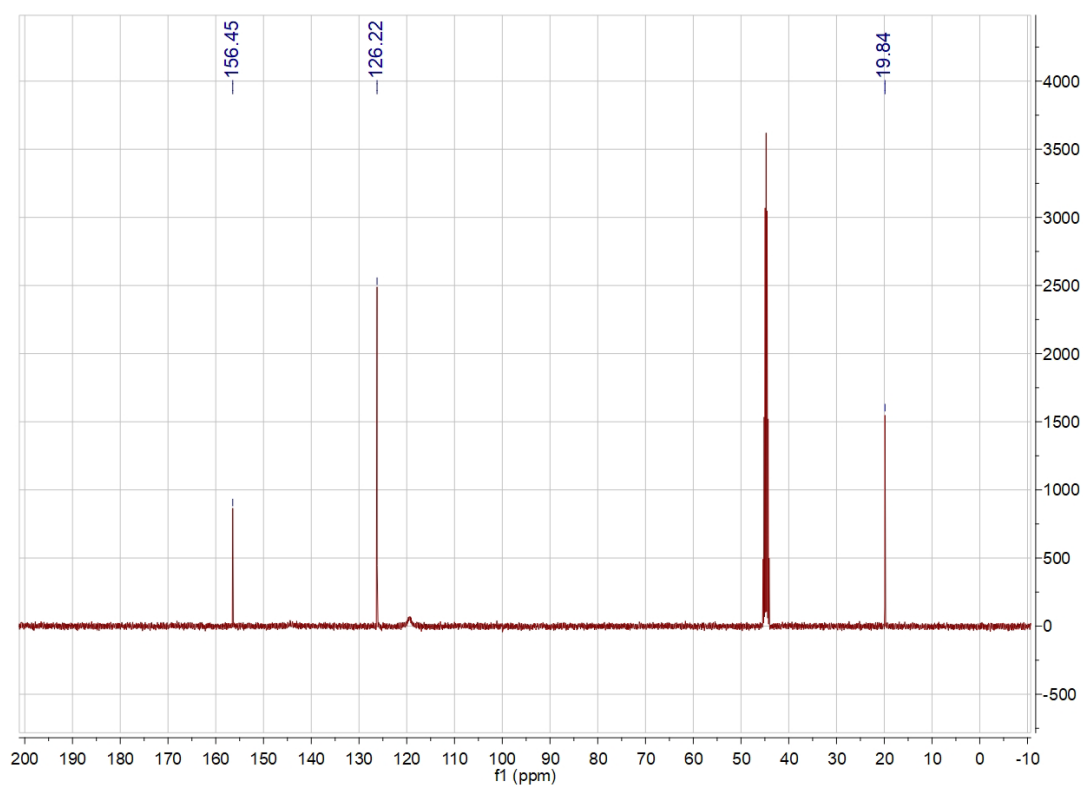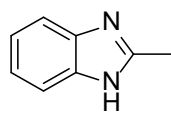

**<sup>1</sup>H NMR (400 MHz, DMSO-d<sub>6</sub>)**  $\delta$  = 7.44 (d,  $J$  = 3.2 Hz, 1H), 7.43 (d,  $J$  = 3.2 Hz, 1H), 7.10 (d,  $J$  = 3.2 Hz, 1H), 7.08 d, ( $J$  = 2.8 Hz, 1H), 2.48 (s, 3H). **<sup>13</sup>C NMR (101 MHz, DMSO)**  $\delta$  = 156.5, 126.2, 19.8.

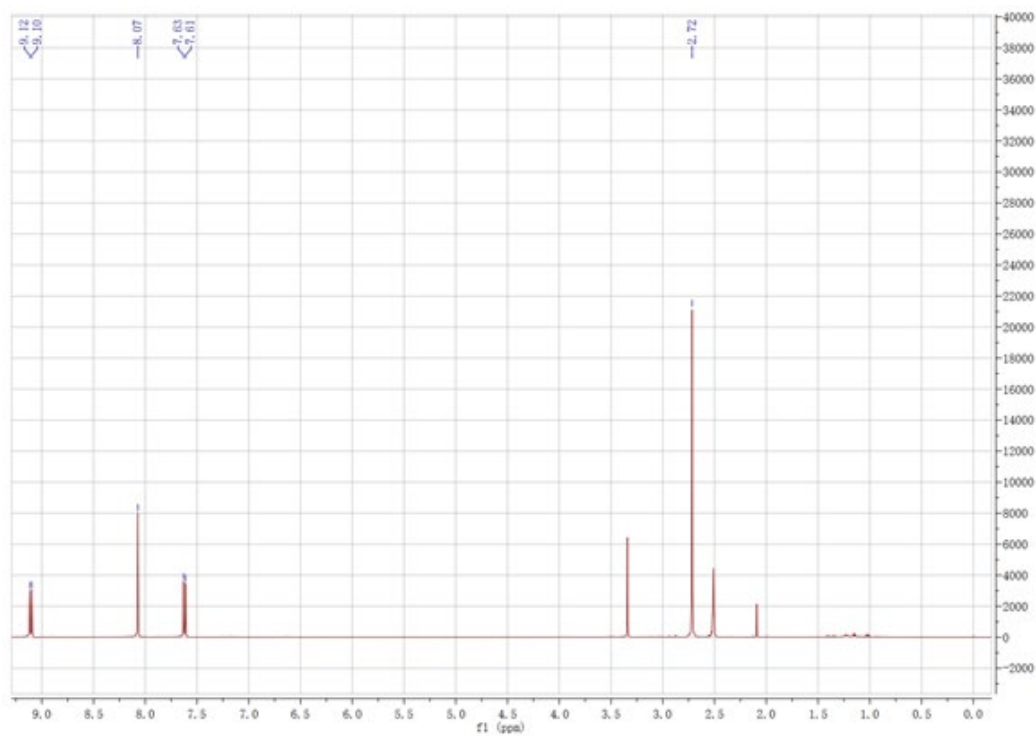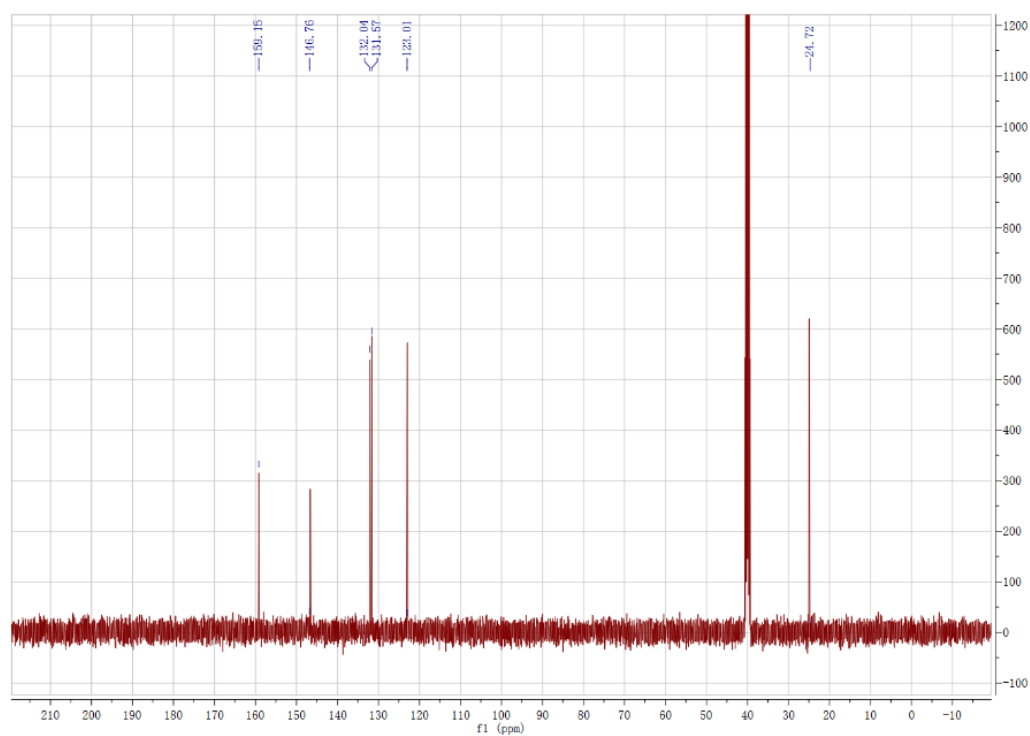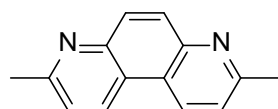

**<sup>1</sup>H NMR (400 MHz, DMSO-*d*<sub>6</sub>)**  $\delta$  = 9.09 (d,  $J$  = 8.4 Hz, 2H), 8.07 (s, 2H), 7.62 (d,  $J$  = 8 Hz, 2H), 2.72 (s, 6H). **<sup>13</sup>C NMR (101 MHz, DMSO-*d*<sub>6</sub>)**  $\delta$  = 159.1, 146.7, 132.0, 131.6, 123.0, 24.7.

## References:

1. C. F. Zhang, X. Wang, M. R. Li, Z. X. Zhang, Y. H. Wang, R. Si and F. Wang, *Chin. J. Catal.*, 2016, **37**, 1569-1578.
2. R. Tokarz-Sobieraj, R. Grybos and M. Witko, *Appl. Catal., A*, 2011, **391**, 137-143.
